# Supplementary material
Source: publisher figshare collection journal article supplement (https://acs.figshare.com/ndownloader/files/5731047)

-----  
1,7-Antarafacial H Shift Transition State 44 to 45

AM1 Heat of Formation: -34.950 kcal/mol

B3LYP/6-31G\*\*/AM1 SCF total energy: -960.5951152 hartrees

One Imaginary Mode -2105 cm<sup>-1</sup>

| Atom     | Cartesian Coordinates (Angstroms) |            |            |
|----------|-----------------------------------|------------|------------|
|          | X                                 | Y          | Z          |
| -----    |                                   |            |            |
| 1 C C1   | -0.0240170                        | 0.6484293  | 1.3320792  |
| 2 C C2   | -1.1829860                        | 0.5436415  | 2.1088072  |
| 3 H H5   | -2.1267286                        | 0.7698398  | 1.5632402  |
| 4 C C3   | 1.2506967                         | 0.1308571  | 1.5803690  |
| 5 C C4   | 1.6314843                         | -0.8847637 | 2.4898521  |
| 6 H H2   | 2.7241473                         | -1.0876091 | 2.5866533  |
| 7 C C5   | -1.3609462                        | 0.2799051  | 3.4555714  |
| 8 H H8   | -2.4079193                        | 0.1309839  | 3.7904242  |
| 9 C C6   | -0.3559676                        | 0.1572088  | 4.4313616  |
| 10 H H10 | 0.5710106                         | 0.7571127  | 4.2602677  |
| 11 O O1  | 0.8520431                         | -1.6502746 | 3.1662705  |
| 12 H H6  | 0.1817051                         | -1.0301065 | 4.0300353  |
| 13 C C7  | 2.3974875                         | 0.6035424  | 0.7642858  |
| 14 C C8  | -0.2555774                        | 1.4295290  | 0.0645060  |
| 15 O O2  | 3.5308459                         | 0.7583630  | 1.2301687  |
| 16 O O3  | -1.2383241                        | 2.1664100  | -0.0614490 |
| 17 C C9  | 2.1269422                         | 0.8800914  | -0.6783217 |
| 18 H H1  | 3.0099797                         | 1.1589622  | -1.2865424 |
| 19 C C10 | 0.7456036                         | 1.3171123  | -1.0483360 |
| 20 C C11 | -0.7450625                        | 0.0483053  | 5.8719019  |
| 21 H H3  | 0.1806323                         | 0.1091849  | 6.5048086  |
| 22 H H9  | -1.3949386                        | 0.9199431  | 6.1551920  |
| 23 C C12 | -1.4720301                        | -1.2449852 | 6.1807985  |
| 24 H H13 | -0.8194889                        | -2.1171547 | 5.9101049  |
| 25 H H14 | -2.3985830                        | -1.3184131 | 5.5523278  |
| 26 C C13 | -1.8464389                        | -1.3259658 | 7.6455181  |
| 27 H H7  | -0.9182356                        | -1.2580619 | 8.2725180  |
| 28 H H17 | -2.4920960                        | -0.4488866 | 7.9159868  |
| 29 C C14 | -2.5756055                        | -2.6071280 | 7.9576365  |
| 30 H H15 | -1.9392756                        | -3.4924360 | 7.7151152  |
| 31 H H18 | -3.5177909                        | -2.6802043 | 7.3623471  |
| 32 H H19 | -2.8393924                        | -2.6484695 | 9.0419403  |
| 33 O O4  | 1.2099079                         | -0.0195612 | -1.3176514 |
| 34 C C15 | 0.4909179                         | 2.1536196  | -2.2736403 |
| 35 H H12 | -0.5850961                        | 2.0159722  | -2.5760806 |
| 36 H H16 | 1.1330465                         | 1.7720672  | -3.1129194 |
| 37 C C16 | 0.7352976                         | 3.5954082  | -2.0193737 |
| 38 H H20 | 0.1476113                         | 4.0189836  | -1.1861502 |
| 39 C C17 | 1.5631122                         | 4.3442562  | -2.7432917 |
| 40 H H11 | 1.7012484                         | 5.4158505  | -2.5474520 |
| 41 H H21 | 2.1542512                         | 3.9461713  | -3.5788563 |

-----  
Syn Trienol Precursor to Cyclohexanol 45

Heat of Formation: -70.481 kcal/mol

B3LYP/6-31G\*\*//AM1 -960.61150

| Atom     | Cartesian Coordinates (Angstroms) |            |            |
|----------|-----------------------------------|------------|------------|
|          | X                                 | Y          | Z          |
| -----    |                                   |            |            |
| 1 C C1   | 0.0141471                         | -0.1012246 | 0.8916913  |
| 2 C C3   | 1.2826396                         | -0.7332066 | 1.2227306  |
| 3 C C4   | 1.4038177                         | -1.9298492 | 1.8564538  |
| 4 H H2   | 2.3839678                         | -2.3959251 | 2.0809648  |
| 5 C C6   | -0.0539414                        | 0.1775106  | 4.0150326  |
| 6 H H10  | 0.9175078                         | 0.5377388  | 3.6272342  |
| 7 O O1   | 0.3958558                         | -2.7283884 | 2.2759398  |
| 8 C C7   | 2.5151142                         | -0.0624969 | 0.7774263  |
| 9 C C8   | -0.1376798                        | 0.3393213  | -0.5194007 |
| 10 O O2  | 3.5898760                         | -0.1544341 | 1.3806208  |
| 11 O O3  | -1.2009801                        | 0.2564720  | -1.1377247 |
| 12 C C9  | 2.4135670                         | 0.7500558  | -0.4765768 |
| 13 H H1  | 3.2449835                         | 1.4683422  | -0.6286171 |
| 14 C C10 | 1.0874327                         | 0.9587325  | -1.1354645 |
| 15 C C11 | -0.1010202                        | 0.0313992  | 5.4864094  |
| 16 H H3  | 0.7271214                         | -0.6660367 | 5.7964406  |
| 17 H H9  | 0.1294125                         | 1.0328093  | 5.9467247  |
| 18 C C12 | -1.4141061                        | -0.4798566 | 6.0387065  |
| 19 H H13 | -1.6516920                        | -1.4796410 | 5.5885729  |
| 20 H H14 | -2.2436584                        | 0.2202994  | 5.7552071  |
| 21 C C13 | -1.3559382                        | -0.6076241 | 7.5470227  |
| 22 H H7  | -0.5235960                        | -1.3046831 | 7.8316006  |
| 23 H H17 | -1.1183286                        | 0.3921564  | 7.9979248  |
| 24 C C14 | -2.6583804                        | -1.1191820 | 8.1071202  |
| 25 H H15 | -2.8986878                        | -2.1267682 | 7.6896358  |
| 26 H H18 | -3.4967632                        | -0.4260889 | 7.8535573  |
| 27 H H19 | -2.5953095                        | -1.2044401 | 9.2188014  |
| 28 O O4  | 2.0426991                         | 0.0144040  | -1.6544394 |
| 29 C C15 | 0.8344314                         | 2.1526360  | -2.0168927 |
| 30 H H16 | 1.7420041                         | 2.3359001  | -2.6532807 |
| 31 C C16 | 0.4793318                         | 3.3585400  | -1.2290652 |
| 32 H H20 | -0.3240985                        | 3.2101966  | -0.4878717 |
| 33 C C17 | 1.0487460                         | 4.5484765  | -1.4033456 |
| 34 H H11 | 0.7458646                         | 5.4305358  | -0.8239361 |
| 35 H H21 | 1.8488196                         | 4.7261278  | -2.1336256 |
| 36 C C2  | -1.0605819                        | -0.0812520 | 3.1685315  |
| 37 H H8  | -2.0431016                        | -0.4258737 | 3.5398874  |
| 38 C C5  | -1.0094735                        | 0.1368680  | 1.7397302  |
| 39 H H23 | -1.9438621                        | 0.5620021  | 1.3170215  |
| 40 H H4  | -0.0195674                        | 1.9006136  | -2.7079389 |
| 41 H H5  | -0.4606517                        | -2.2983189 | 2.1053237  |

-----  
Anti-Trienol - Precursor to Cyclohexanol 46

AM1 Heat of Formation: -72.571 kcal/mol

B3LYP/6-31G\*\*/AM1 SCF total energy: -960.6153555 hartrees

| Cartesian Coordinates (Angstroms) |            |            |            |
|-----------------------------------|------------|------------|------------|
| Atom                              | X          | Y          | Z          |
| -----                             |            |            |            |
| 1 C C1                            | -0.0682310 | 0.0034489  | 0.9325019  |
| 2 C C3                            | 1.1782765  | -0.7005404 | 1.2089765  |
| 3 C C4                            | 1.1437080  | -2.0438189 | 1.4507730  |
| 4 H H2                            | 0.2032505  | -2.6317793 | 1.4179231  |
| 5 C C6                            | -1.0891775 | -1.0775625 | 3.8498390  |
| 6 H H10                           | -0.4467132 | -0.2246931 | 4.1344604  |
| 7 O O1                            | 2.1791807  | -2.8546191 | 1.7437258  |
| 8 C C7                            | 2.4349142  | 0.0475332  | 1.2033821  |
| 9 C C8                            | -0.0351675 | 1.0782405  | -0.0902111 |
| 10 O O2                           | 3.4738927  | -0.3811028 | 1.7316014  |
| 11 O O3                           | -0.9874694 | 1.3193123  | -0.8363119 |
| 12 C C9                           | 2.4498958  | 1.3817595  | 0.5256454  |
| 13 H H1                           | 3.2498473  | 2.0649241  | 0.8777744  |
| 14 C C10                          | 1.2161169  | 1.9110406  | -0.1277249 |
| 15 C C11                          | -1.3983295 | -1.9960605 | 4.9689941  |
| 16 H H3                           | -0.4269729 | -2.3879370 | 5.3818754  |
| 17 H H9                           | -1.8834160 | -1.3992919 | 5.7911498  |
| 18 C C12                          | -2.2926830 | -3.1631938 | 4.6098779  |
| 19 H H13                          | -1.8133508 | -3.7739047 | 3.7998467  |
| 20 H H14                          | -3.2692391 | -2.7835519 | 4.2085658  |
| 21 C C13                          | -2.5506296 | -4.0415115 | 5.8165906  |
| 22 H H7                           | -1.5739370 | -4.4215062 | 6.2181880  |
| 23 H H17                          | -3.0264158 | -3.4305482 | 6.6289532  |
| 24 C C14                          | -3.4427598 | -5.2053944 | 5.4700172  |
| 25 H H15                          | -2.9729182 | -5.8417822 | 4.6815313  |
| 26 H H18                          | -4.4293569 | -4.8468599 | 5.0885195  |
| 27 H H19                          | -3.6225624 | -5.8378768 | 6.3726224  |
| 28 O O4                           | 2.2901236  | 1.3426914  | -0.9022132 |
| 29 C C15                          | 1.0074469  | 3.3889539  | -0.3237524 |
| 30 H H16                          | 1.9718913  | 3.8513978  | -0.6679578 |
| 31 C C16                          | 0.5068954  | 4.0471969  | 0.9082020  |
| 32 H H20                          | -0.3668043 | 3.5612736  | 1.3742718  |
| 33 C C17                          | 1.0334972  | 5.1582556  | 1.4170272  |
| 34 H H11                          | 0.6244127  | 5.6395048  | 2.3150329  |
| 35 H H21                          | 1.9012396  | 5.6650491  | 0.9740001  |
| 36 C C2                           | -1.5173440 | -1.2098077 | 2.5896831  |
| 37 H H8                           | -2.1748270 | -2.0452571 | 2.2854650  |
| 38 C C5                           | -1.2502390 | -0.2542034 | 1.5310368  |
| 39 H H23                          | -2.1490611 | 0.2996187  | 1.1891047  |
| 40 H H4                           | 0.2512824  | 3.5278725  | -1.1480548 |
| 41 H H5                           | 3.0205506  | -2.3631396 | 1.7854802  |

-----  
Cyclohexanol Product Forming Transition State 46 to 42

AM1 Heat of Formation: -38.567 kcal/mol

B3LYP/6-31G\*\*/AM1: SCF total energy: -960.5750051 hartrees

One imaginary mode -745 cm<sup>-1</sup>

| Atom     | Cartesian Coordinates (Angstroms) |            |            |
|----------|-----------------------------------|------------|------------|
|          | X                                 | Y          | Z          |
| -----    |                                   |            |            |
| 1 C C1   | -1.1608100                        | -0.7299854 | 0.8003663  |
| 2 C C3   | 0.1787628                         | -0.9172428 | 0.4200526  |
| 3 C C7   | 0.6072916                         | -2.2391112 | -0.0688618 |
| 4 C C8   | -1.9520218                        | -1.8578818 | 1.3516622  |
| 5 O O2   | 1.4164882                         | -2.4217395 | -0.9810644 |
| 6 O O3   | -3.0892290                        | -1.6970792 | 1.8070226  |
| 7 C C9   | -0.0170529                        | -3.4077471 | 0.6313072  |
| 8 H H1   | 0.2863016                         | -4.4000238 | 0.2403203  |
| 9 C C10  | -1.3224910                        | -3.2238250 | 1.3385328  |
| 10 O O4  | -0.0802124                        | -3.3227815 | 2.0627415  |
| 11 C C15 | -2.2607178                        | -4.3844222 | 1.5393218  |
| 12 H H16 | -1.6601208                        | -5.3014007 | 1.7842934  |
| 13 C C16 | -3.1248267                        | -4.6062462 | 0.3535213  |
| 14 H H20 | -3.6905984                        | -3.7173998 | 0.0251191  |
| 15 C C17 | -3.2506574                        | -5.7794059 | -0.2612129 |
| 16 H H11 | -3.9198490                        | -5.9187717 | -1.1203764 |
| 17 H H21 | -2.7015701                        | -6.6783426 | 0.0490198  |
| 18 H H4  | -2.9148571                        | -4.1561005 | 2.4277437  |
| 19 C C2  | -1.8696987                        | 0.4279135  | 0.4719772  |
| 20 H H3  | -2.9688488                        | 0.3994659  | 0.5951643  |
| 21 C C4  | -1.3015483                        | 1.5055623  | -0.2009474 |
| 22 H H5  | -1.9080153                        | 1.9759112  | -0.9977343 |
| 23 C C5  | 1.0954930                         | 0.1609023  | 0.3913217  |
| 24 H H7  | 1.3515987                         | 0.6415442  | 1.3550685  |
| 25 C C6  | 0.0045964                         | 1.9471558  | 0.0016517  |
| 26 H H10 | 0.2847336                         | 2.1995375  | 1.0426186  |
| 27 O O1  | 2.0963113                         | 0.0872416  | -0.5441625 |
| 28 H H6  | 2.7975369                         | 0.6986199  | -0.2748736 |
| 29 C C11 | 0.7051578                         | 2.7237611  | -1.0552382 |
| 30 H H2  | 1.2155401                         | 1.9968798  | -1.7493550 |
| 31 H H12 | -0.0343404                        | 3.3007523  | -1.6741391 |
| 32 C C12 | 1.7353272                         | 3.6751429  | -0.4806162 |
| 33 H H14 | 1.2424387                         | 4.3801368  | 0.2393591  |
| 34 C C18 | 2.4227615                         | 4.4661516  | -1.5730356 |
| 35 H H17 | 2.8904875                         | 3.7600069  | -2.3093545 |
| 36 H H23 | 1.6589336                         | 5.0681336  | -2.1330678 |
| 37 C C19 | 3.4768834                         | 5.3838483  | -1.0097723 |
| 38 H H9  | 4.2687733                         | 4.7990625  | -0.4817275 |
| 39 H H24 | 3.0278599                         | 6.1015721  | -0.2811936 |
| 40 H H25 | 3.9589907                         | 5.9689442  | -1.8298044 |
| 41 H H26 | 2.4997325                         | 3.0912606  | 0.0983521  |

## Cyclohexanol Product 42

AM1 Heat of Formation: -82.360 kcal/mol

B3LYP/6-31G\*\*//AM1 SCF total energy: -960.6318299 hartrees

| Atom     | Cartesian Coordinates (Angstroms) |            |            |
|----------|-----------------------------------|------------|------------|
|          | X                                 | Y          | Z          |
| 1 C C1   | 0.1427365                         | -0.3218413 | 0.6908890  |
| 2 C C3   | 1.3964758                         | -0.6760192 | 1.0680782  |
| 3 C C7   | 2.5746546                         | -0.4136571 | 0.2183831  |
| 4 C C8   | -0.1573624                        | 0.3748694  | -0.5836000 |
| 5 O O2   | 3.6692247                         | -0.9579106 | 0.3942354  |
| 6 O O3   | -1.2988693                        | 0.4618389  | -1.0398448 |
| 7 C C9   | 2.3912922                         | 0.5818926  | -0.8862845 |
| 8 H H1   | 3.2684104                         | 1.2378224  | -1.0612094 |
| 9 C C10  | 1.0156548                         | 1.0002912  | -1.2878462 |
| 10 O O4  | 1.7827760                         | 0.0714020  | -2.0822578 |
| 11 C C15 | 0.7553665                         | 2.3318986  | -1.9377378 |
| 12 H H16 | 1.5735599                         | 2.5426239  | -2.6783489 |
| 13 C C16 | 0.6414416                         | 3.4225610  | -0.9379658 |
| 14 H H20 | -0.0732299                        | 3.2316758  | -0.1195878 |
| 15 C C17 | 1.3142120                         | 4.5679211  | -1.0163724 |
| 16 H H11 | 1.1882487                         | 5.3697913  | -0.2768753 |
| 17 H H21 | 2.0294797                         | 4.7871777  | -1.8208476 |
| 18 H H4  | -0.2115471                        | 2.2570221  | -2.5120162 |
| 19 C C2  | -0.9920667                        | -0.6162664 | 1.5493770  |
| 20 H H3  | -1.9939486                        | -0.4801218 | 1.1097194  |
| 21 C C4  | -0.8083768                        | -1.0194811 | 2.8157959  |
| 22 H H5  | -1.6601191                        | -1.2115181 | 3.4870496  |
| 23 C C5  | 1.6102448                         | -1.4512170 | 2.3454274  |
| 24 H H7  | 1.5501155                         | -2.5454430 | 2.0572056  |
| 25 C C6  | 0.5424264                         | -1.1802364 | 3.4244973  |
| 26 H H10 | 0.5286108                         | -2.0950982 | 4.0857298  |
| 27 O O1  | 2.8687727                         | -1.1861903 | 2.9375130  |
| 28 H H6  | 3.5450730                         | -1.6083863 | 2.3892063  |
| 29 C C11 | 0.8567895                         | 0.0360639  | 4.2947195  |
| 30 H H2  | 1.4542713                         | 0.7727909  | 3.6968881  |
| 31 H H12 | -0.1006854                        | 0.5397360  | 4.5943338  |
| 32 C C12 | 1.6287658                         | -0.3449504 | 5.5406597  |
| 33 H H14 | 1.0320406                         | -1.0736302 | 6.1499444  |
| 34 C C18 | 1.9444348                         | 0.8752326  | 6.3798003  |
| 35 H H17 | 2.5562691                         | 1.5948794  | 5.7743611  |
| 36 H H23 | 0.9913303                         | 1.4002932  | 6.6530686  |
| 37 C C19 | 2.6943011                         | 0.5032258  | 7.6327197  |
| 38 H H9  | 3.6536756                         | -0.0095220 | 7.3797845  |
| 39 H H24 | 2.0859778                         | -0.1860503 | 8.2666940  |
| 40 H H25 | 2.9292464                         | 1.4167199  | 8.2303548  |
| 41 H H26 | 2.5826708                         | -0.8563692 | 5.2421642  |

-----  
 [4+2] Transition State to 3

Heat of Formation: -119.003 kcal/mol

B3LYP/6-31G\*\*/AM1 SCF total energy: -1921.2635588 hartrees

Imaginary Mode -757.62

| Atom     | Cartesian Coordinates (Angstroms) |            |            |
|----------|-----------------------------------|------------|------------|
|          | X                                 | Y          | Z          |
| -----    | -----                             | -----      | -----      |
| 1 C C1   | -1.0139438                        | -2.9502854 | -0.4800060 |
| 2 C C2   | -2.2595764                        | -2.8164976 | 0.0607700  |
| 3 H H6   | -2.9767249                        | -3.6475265 | 0.1966477  |
| 4 C C3   | -0.6433681                        | -4.2550435 | -1.0367628 |
| 5 O O1   | -1.3500591                        | -5.2634763 | -0.9093102 |
| 6 C C5   | -0.6250012                        | -0.5657988 | -0.0470876 |
| 7 H H10  | -0.1677317                        | 0.3497396  | -0.4889394 |
| 8 C C6   | -2.1138391                        | -0.4270380 | 0.1593845  |
| 9 O O2   | -2.7751213                        | -1.6538351 | 0.5408289  |
| 10 C C7  | 0.6103271                         | -4.3205002 | -1.8487706 |
| 11 H H9  | 0.6394899                         | -5.1631633 | -2.5710752 |
| 12 C C8  | 1.4340545                         | -3.0931487 | -2.0739516 |
| 13 O O3  | 1.8374095                         | -4.1143528 | -1.1363045 |
| 14 C C9  | 1.0161137                         | -1.7896017 | -1.4460902 |
| 15 O O4  | 1.6116610                         | -0.7429178 | -1.7474441 |
| 16 C C10 | 2.3128965                         | -2.9819865 | -3.2925270 |
| 17 H H4  | 2.8056318                         | -3.9739940 | -3.4796559 |
| 18 H H7  | 3.1255579                         | -2.2332517 | -3.0721118 |
| 19 C C11 | -2.7669133                        | 0.1187374  | -1.1119776 |
| 20 H H11 | -2.1843344                        | 1.0106335  | -1.4623418 |
| 21 H H14 | -2.7171379                        | -0.6611892 | -1.9157820 |
| 22 C C4  | -0.1259234                        | -1.8051671 | -0.5297829 |
| 23 C C12 | 1.3222517                         | -2.5014242 | 1.3552952  |
| 24 H H15 | 1.6643628                         | -3.4908521 | 0.9870827  |
| 25 C C15 | 0.0466697                         | -0.1929872 | 1.7411312  |
| 26 H H12 | -0.4950020                        | 0.7513244  | 1.9435039  |
| 27 O O5  | 0.2190475                         | -2.6067025 | 2.1231460  |
| 28 C C16 | -0.4054072                        | -1.3687631 | 2.5638226  |
| 29 C C14 | 2.0999208                         | -1.3325036 | 1.2853916  |
| 30 C C17 | 1.4353849                         | -0.1143531 | 1.4837245  |
| 31 C C18 | 3.5219940                         | -1.4026785 | 0.9321373  |
| 32 C C19 | 2.0807748                         | 1.1895973  | 1.2394925  |
| 33 C C20 | 4.2918257                         | -0.1227472 | 1.0507144  |
| 34 H H23 | 5.3112077                         | -0.1662515 | 0.6131417  |
| 35 C C21 | 3.5823919                         | 1.1909448  | 1.1972336  |
| 36 O O6  | 4.2164197                         | 0.5436201  | 2.3178750  |
| 37 O O7  | 4.0858272                         | -2.4394743 | 0.5707358  |
| 38 O O8  | 1.4204512                         | 2.2174947  | 1.0582950  |
| 39 C C22 | -0.0928737                        | -1.1985848 | 4.0483841  |
| 40 H H5  | 0.9414431                         | -0.7849026 | 4.1733039  |
| 41 H H19 | -0.1111982                        | -2.2111877 | 4.5331053  |
| 42 C C23 | 4.2371901                         | 2.4535493  | 0.7030034  |
| 43 H H16 | 3.7484308                         | 2.7326509  | -0.2719368 |
| 44 H H20 | 5.3225880                         | 2.2459609  | 0.5005671  |

|          |            |            |            |
|----------|------------|------------|------------|
| 45 C C13 | 1.5497486  | -2.5246592 | -4.4802473 |
| 46 H H18 | 0.9654388  | -1.6015779 | -4.3234044 |
| 47 C C24 | 1.5789769  | -3.1398616 | -5.6594888 |
| 48 C C28 | -4.2069655 | 0.5114318  | -0.8634386 |
| 49 H H24 | -4.2478987 | 1.3310615  | -0.0981721 |
| 50 H H29 | -4.7637683 | -0.3663958 | -0.4401049 |
| 51 C C29 | -4.8729593 | 0.9752417  | -2.1409748 |
| 52 H H13 | -4.3025311 | 1.8403928  | -2.5709662 |
| 53 H H32 | -4.8458009 | 0.1503823  | -2.9010812 |
| 54 C C30 | -6.3084439 | 1.3877471  | -1.8926165 |
| 55 H H30 | -6.3338438 | 2.2143397  | -1.1340259 |
| 56 H H33 | -6.8754869 | 0.5228317  | -1.4572115 |
| 57 C C31 | -6.9785229 | 1.8451371  | -3.1624230 |
| 58 H H31 | -6.4399399 | 2.7203780  | -3.5996784 |
| 59 H H35 | -8.0337264 | 2.1471644  | -2.9568559 |
| 60 H H36 | -6.9876956 | 1.0255525  | -3.9211491 |
| 61 C C33 | -1.1022288 | -0.2914437 | 4.7170720  |
| 62 H H39 | -2.1332779 | -0.7187132 | 4.5992268  |
| 63 H H40 | -1.0986559 | 0.7132358  | 4.2170433  |
| 64 C C34 | -0.7879461 | -0.1257543 | 6.1888152  |
| 65 H H2  | 0.2431290  | 0.3002722  | 6.3082591  |
| 66 H H41 | -0.7914513 | -1.1298303 | 6.6894559  |
| 67 C C35 | -1.7932446 | 0.7820291  | 6.8653263  |
| 68 H H43 | -2.8246072 | 0.3582435  | 6.7387036  |
| 69 H H44 | -1.7853727 | 1.7866393  | 6.3653296  |
| 70 C C36 | -1.4891740 | 0.9443069  | 8.3322636  |
| 71 H H42 | -0.4734774 | 1.3854821  | 8.4782385  |
| 72 H H45 | -1.5196994 | -0.0432433 | 8.8531679  |
| 73 H H46 | -2.2391073 | 1.6190571  | 8.8111688  |
| 74 C C37 | 4.0879600  | 3.5842021  | 1.6536286  |
| 75 C C38 | 5.1096519  | 4.3025524  | 2.1118915  |
| 76 H H1  | -2.3564090 | 0.2535459  | 1.0270557  |
| 77 H H3  | -1.5071704 | -1.5698499 | 2.4203626  |
| 78 H H37 | 3.0458780  | 3.8045879  | 1.9438294  |
| 79 H H22 | 2.1573079  | -4.0553547 | -5.8408831 |
| 80 H H27 | 1.0255568  | -2.7615007 | -6.5288234 |
| 81 H H38 | 4.9655688  | 5.1486616  | 2.7964874  |
| 82 H H47 | 6.1538359  | 4.0989892  | 1.8402415  |

## [4+2] Transition State to 33

AM1 Heat of Formation: -118.6 kcal/mol

B3LYP/6-31G\* SCF total energy: -1921.2628702 hartrees  
-767.43 cm<sup>-1</sup>

| Atom   | Cartesian Coordinates (Angstroms) |            |            |
|--------|-----------------------------------|------------|------------|
|        | X                                 | Y          | Z          |
| -----  |                                   |            |            |
| 1 O O1 | -8.9495896                        | 0.9978396  | -7.2253378 |
| 2 O O2 | -8.8953344                        | -3.0464100 | -6.2296449 |
| 3 O O3 | -10.4393994                       | 0.4153009  | -2.3909164 |
| 4 O O4 | -11.6737298                       | -2.1851408 | -4.3336059 |

|          |             |            |             |
|----------|-------------|------------|-------------|
| 5 C C1   | -8.6704241  | -0.2333924 | -6.7387284  |
| 6 C C2   | -9.3453040  | -0.7867179 | -5.6355238  |
| 7 C C3   | -9.4683715  | -2.2403792 | -5.4879326  |
| 8 C C4   | -10.3421808 | -2.7189152 | -4.3708120  |
| 9 C C5   | -10.7715124 | -1.7787077 | -3.2863046  |
| 10 C C6  | -10.3402382 | -0.3394677 | -3.3631453  |
| 11 C C7  | -9.7894241  | 0.1101661  | -4.6537804  |
| 12 C C8  | -9.5164507  | 1.4760493  | -4.8916490  |
| 13 C C9  | -9.6113474  | 1.9263407  | -6.3240913  |
| 14 C C10 | -11.0651159 | 2.0759434  | -6.7650620  |
| 15 C C11 | -11.1631359 | 2.7559655  | -8.1130786  |
| 16 C C12 | -12.6021525 | 2.8478846  | -8.5728890  |
| 17 C C13 | -12.7049343 | 3.5374367  | -9.9168888  |
| 18 C C14 | -14.1352673 | 3.6287495  | -10.3820467 |
| 19 C C15 | -11.0769376 | -2.2579497 | -1.8936537  |
| 20 C C16 | -11.5661775 | -3.6567360 | -1.8437417  |
| 21 C C17 | -11.1817909 | -4.5374743 | -0.9230739  |
| 22 O O7  | -6.9148344  | 3.4644739  | -5.9152910  |
| 23 O O8  | -5.1388243  | 0.8376121  | -8.6359737  |
| 24 O O9  | -6.8563549  | -1.1068843 | -3.8185985  |
| 25 C C20 | -6.2763279  | 2.5953947  | -6.7426746  |
| 26 C C21 | -6.2071460  | 1.2477534  | -6.5507717  |
| 27 C C22 | -5.4337375  | 0.4426567  | -7.5013291  |
| 28 C C23 | -4.9984825  | -0.9097978 | -7.0377395  |
| 29 C C24 | -5.5176294  | -1.4823306 | -5.7557472  |
| 30 C C25 | -6.4652316  | -0.6710982 | -4.9112282  |
| 31 C C26 | -6.8838333  | 0.6447545  | -5.4179091  |
| 32 C C27 | -7.5728131  | 1.5126618  | -4.5295261  |
| 33 C C28 | -7.2845263  | 2.9909484  | -4.6007456  |
| 34 C C29 | -6.1726170  | 3.3503448  | -3.6127507  |
| 35 C C30 | -6.0309080  | 4.8499500  | -3.4692993  |
| 36 C C31 | -4.8799091  | 5.2019415  | -2.5516652  |
| 37 C C32 | -4.7428752  | 6.7015823  | -2.3946147  |
| 38 C C33 | -3.5951024  | 7.0582698  | -1.4858109  |
| 39 H H1  | -8.0868491  | -0.8291490 | -7.4646602  |
| 40 H H2  | -10.2791203 | -3.8102730 | -4.1745420  |
| 41 H H3  | -9.8489083  | 2.2157640  | -4.1399040  |
| 42 H H4  | -9.0531475  | 2.8934254  | -6.4909978  |
| 43 H H5  | -11.5467002 | 1.0644635  | -6.8115780  |
| 44 H H6  | -11.6079104 | 2.6788920  | -5.9908459  |
| 45 H H7  | -10.5591576 | 2.1797651  | -8.8635205  |
| 46 H H8  | -10.7205189 | 3.7851258  | -8.0506353  |
| 47 H H9  | -13.0412526 | 1.8178697  | -8.6450476  |
| 48 H H10 | -13.2055397 | 3.4122880  | -7.8138065  |
| 49 H H11 | -12.2657676 | 4.5675015  | -9.8432170  |
| 50 H H12 | -12.0974518 | 2.9732143  | -10.6732137 |
| 51 H H13 | -14.1884667 | 4.1395905  | -11.3736354 |
| 52 H H14 | -14.7513424 | 4.2087187  | -9.6529146  |
| 53 H H15 | -14.5823519 | 2.6104100  | -10.4854583 |
| 54 H H16 | -10.1461491 | -2.1292827 | -1.2764801  |
| 55 H H17 | -11.8632670 | -1.5793193 | -1.4567190  |
| 56 H H18 | -12.3069991 | -3.9165822 | -2.6197931  |
| 57 H H22 | -5.8479970  | 3.1286877  | -7.6117823  |
| 58 H H24 | -7.7002691  | 1.1477839  | -3.4853719  |
| 59 H H25 | -8.2026381  | 3.6080399  | -4.3739486  |
| 60 H H26 | -6.4133311  | 2.8938850  | -2.6171306  |



|          |             |            |            |
|----------|-------------|------------|------------|
| 61 H H27 | -5.2058820  | 2.9075162  | -3.9683322 |
| 62 H H28 | -6.9830649  | 5.2821625  | -3.0624372 |
| 63 H H29 | -5.8648244  | 5.3060113  | -4.4813428 |
| 64 H H30 | -5.0421838  | 4.7320233  | -1.5458462 |
| 65 H H31 | -3.9260850  | 4.7790751  | -2.9643508 |
| 66 H H32 | -5.6968778  | 7.1228551  | -1.9802908 |
| 67 H H33 | -4.5857098  | 7.1696902  | -3.4023152 |
| 68 H H34 | -3.5118302  | 8.1671401  | -1.3833886 |
| 69 H H35 | -2.6318047  | 6.6684830  | -1.8952494 |
| 70 H H36 | -3.7456721  | 6.6203926  | -0.4694108 |
| 71 H H43 | -10.4462808 | -4.3024594 | -0.1421422 |
| 72 H H47 | -11.5833954 | -5.5588307 | -0.8899828 |
| 73 H H37 | -4.6337971  | -1.5746838 | -7.8487330 |
| 74 O O5  | -4.1908095  | -0.9283567 | -5.8520217 |
| 75 C C18 | -5.5951624  | -2.9788581 | -5.5944649 |
| 76 H H19 | -5.0755665  | -3.4658479 | -6.4637146 |
| 77 H H20 | -6.6818001  | -3.2755399 | -5.6354350 |
| 78 C C19 | -5.0158297  | -3.4497854 | -4.3114189 |
| 79 H H38 | -5.3514836  | -2.8899922 | -3.4208934 |
| 80 C C34 | -4.1753973  | -4.4770789 | -4.2181043 |
| 81 H H23 | -3.7805751  | -4.8197015 | -3.2528660 |
| 82 H H39 | -3.8236883  | -5.0439662 | -5.0900034 |

-----

[4+2] Dimer 32

Heat of Formation: -166.440 kcal/mol  
 B3LYP/6-31G\*\*/AM1 -1921.3058355 hartrees

| Atom     | Cartesian Coordinates (Angstroms) |            |            |
|----------|-----------------------------------|------------|------------|
|          | X                                 | Y          | Z          |
| -----    |                                   |            |            |
| 1 O O1   | 8.8826678                         | 7.1611105  | -0.9357511 |
| 2 O O2   | 8.7149864                         | 6.1431596  | 2.9187365  |
| 3 O O3   | 11.2778162                        | 2.8542869  | -0.6359770 |
| 4 O O4   | 11.7042110                        | 4.6996910  | 2.1827644  |
| 5 C C1   | 8.1385729                         | 6.3771475  | -0.0010761 |
| 6 C C2   | 9.0903514                         | 5.4201641  | 0.6776241  |
| 7 C C3   | 9.3219430                         | 5.4205091  | 2.1279611  |
| 8 C C4   | 10.3570420                        | 4.4455995  | 2.6078775  |
| 9 C C5   | 11.0575415                        | 3.5255613  | 1.6547695  |
| 10 C C6  | 10.7446733                        | 3.6065793  | 0.1821098  |
| 11 C C7  | 9.7494598                         | 4.6205486  | -0.1950003 |
| 12 C C8  | 9.3495229                         | 4.8616014  | -1.6230882 |
| 13 C C9  | 9.5636811                         | 6.3609100  | -1.9210349 |
| 14 C C10 | 11.0362875                        | 6.7434252  | -1.9358466 |
| 15 C C11 | 11.2272206                        | 8.1607917  | -2.4308736 |
| 16 C C12 | 12.6874828                        | 8.5569855  | -2.4008507 |
| 17 C C13 | 12.8823347                        | 9.9717723  | -2.9032716 |
| 18 C C14 | 14.3346372                        | 10.3725869 | -2.8757475 |
| 19 C C15 | 11.5984244                        | 2.1912604  | 2.0908640  |
| 20 C C16 | 11.9877348                        | 2.1494637  | 3.5209401  |
| 21 C C17 | 11.7407761                        | 1.1144861  | 4.3203042  |
| 22 O O7  | 7.0256687                         | 5.7924635  | -3.7150225 |
| 23 O O8  | 4.8093860                         | 8.4119895  | -1.3596060 |

|          |            |            |            |
|----------|------------|------------|------------|
| 24 O O9  | 6.2684728  | 3.5575046  | 0.3464834  |
| 25 O O10 | 5.6670371  | 6.8255612  | 1.5357222  |
| 26 C C20 | 6.2882826  | 6.6040018  | -2.9128336 |
| 27 C C21 | 6.1981567  | 6.4897372  | -1.5644771 |
| 28 C C22 | 5.2525122  | 7.3685393  | -0.8658129 |
| 29 C C23 | 4.7322781  | 6.8884066  | 0.4538076  |
| 30 C C24 | 5.1918088  | 5.5726885  | 1.0059059  |
| 31 C C25 | 6.1943923  | 4.7808213  | 0.2124702  |
| 32 C C26 | 7.0598851  | 5.5448959  | -0.7889061 |
| 33 C C27 | 7.8357722  | 4.5614149  | -1.7080160 |
| 34 C C28 | 7.3726022  | 4.5085849  | -3.1609566 |
| 35 C C29 | 6.1985196  | 3.5481272  | -3.3392175 |
| 36 C C30 | 5.8885033  | 3.3213496  | -4.8029324 |
| 37 C C31 | 4.6860992  | 2.4178216  | -4.9712992 |
| 38 C C32 | 4.3747554  | 2.1865412  | -6.4347090 |
| 39 C C33 | 3.1804549  | 1.2841739  | -6.6086130 |
| 40 C C34 | 4.2801395  | 4.7830872  | 1.9089481  |
| 41 C C35 | 4.9980358  | 4.1650714  | 3.0518583  |
| 42 C C36 | 4.6706913  | 4.3661499  | 4.3255151  |
| 43 H H1  | 7.6761330  | 7.1192093  | 0.7035051  |
| 44 H H2  | 10.2618328 | 4.1716143  | 3.6802832  |
| 45 H H3  | 9.9323725  | 4.2223293  | -2.3321040 |
| 46 H H4  | 9.0836906  | 6.6157384  | -2.9089598 |
| 47 H H5  | 11.4589227 | 6.6448457  | -0.9019916 |
| 48 H H6  | 11.5839506 | 6.0274044  | -2.6028221 |
| 49 H H7  | 10.6279628 | 8.8587389  | -1.7874869 |
| 50 H H8  | 10.8326531 | 8.2518515  | -3.4771656 |
| 51 H H9  | 13.0784865 | 8.4741907  | -1.3524731 |
| 52 H H10 | 13.2843197 | 7.8481674  | -3.0334049 |
| 53 H H11 | 12.4881137 | 10.0542126 | -3.9506913 |
| 54 H H12 | 12.2837358 | 10.6782201 | -2.2691598 |
| 55 H H13 | 14.4556567 | 11.4182814 | -3.2484817 |
| 56 H H14 | 14.9436033 | 9.6949804  | -3.5220667 |
| 57 H H15 | 14.7386673 | 10.3198246 | -1.8356898 |
| 58 H H16 | 10.8218959 | 1.4127156  | 1.8587974  |
| 59 H H17 | 12.5030746 | 1.9607424  | 1.4589386  |
| 60 H H18 | 12.5340640 | 3.0397247  | 3.8783733  |
| 61 H H22 | 5.7822498  | 7.3903169  | -3.5058641 |
| 62 H H23 | 3.7423133  | 7.3081804  | 0.7303311  |
| 63 H H24 | 7.6994545  | 3.5154833  | -1.2989261 |
| 64 H H25 | 8.2282746  | 4.1895448  | -3.8266752 |
| 65 H H26 | 6.4520988  | 2.5705778  | -2.8513141 |
| 66 H H27 | 5.2981534  | 3.9655503  | -2.8175038 |
| 67 H H28 | 6.7784865  | 2.8629271  | -5.3097323 |
| 68 H H29 | 5.6966608  | 4.3088757  | -5.3007572 |
| 69 H H30 | 4.8804467  | 1.4338659  | -4.4682672 |
| 70 H H31 | 3.7954894  | 2.8769214  | -4.4664709 |
| 71 H H32 | 5.2679437  | 1.7316421  | -6.9394617 |
| 72 H H33 | 4.1793747  | 3.1719139  | -6.9353031 |
| 73 H H34 | 2.9666688  | 1.1291973  | -7.6936135 |
| 74 H H35 | 2.2749536  | 1.7311092  | -6.1311368 |
| 75 H H36 | 3.3670679  | 0.2875395  | -6.1398777 |
| 76 H H37 | 3.4604385  | 5.4583906  | 2.2754243  |
| 77 H H38 | 3.8112689  | 3.9668102  | 1.2923599  |
| 78 H H39 | 5.8281383  | 3.4974086  | 2.7641325  |
| 79 H H43 | 11.2010038 | 0.2178432  | 3.9875227  |

|          |            |           |           |
|----------|------------|-----------|-----------|
| 80 H H47 | 12.0690653 | 1.0961002 | 5.3679627 |
| 81 H H50 | 5.2086239  | 3.8781026 | 5.1488350 |
| 82 H H52 | 3.8533152  | 5.0305346 | 4.6354824 |

-----  
 [4+2] Dimer 33 AM1 optimized geometry

Heat of Formation: -167.865 kcal/mol

B3LYP/6-31G\*//AM1 = -1921.3032431 hartrees

| Atom     | Cartesian Coordinates (Angstroms) |            |            |
|----------|-----------------------------------|------------|------------|
|          | X                                 | Y          | Z          |
| 1 O O1   | 8.9559458                         | 7.1703914  | -0.8954598 |
| 2 O O2   | 8.6844813                         | 6.0512158  | 2.9425651  |
| 3 O O3   | 11.2337679                        | 2.8016978  | -0.6458865 |
| 4 O O4   | 11.7246502                        | 4.6927353  | 2.1456822  |
| 5 C C1   | 8.1814488                         | 6.3937983  | 0.0212278  |
| 6 C C2   | 9.1065934                         | 5.4044098  | 0.6897843  |
| 7 C C3   | 9.3303117                         | 5.3738653  | 2.1396857  |
| 8 C C4   | 10.3922726                        | 4.4229281  | 2.6050023  |
| 9 C C5   | 11.0828835                        | 3.5060037  | 1.6405950  |
| 10 C C6  | 10.7347241                        | 3.5734182  | 0.1749332  |
| 11 C C7  | 9.7518132                         | 4.6040947  | -0.1929578 |
| 12 C C8  | 9.3504805                         | 4.8642956  | -1.6176332 |
| 13 C C9  | 9.5940004                         | 6.3620303  | -1.9045659 |
| 14 C C10 | 11.0743527                        | 6.7106702  | -1.9460953 |
| 15 C C11 | 11.2878907                        | 8.1258491  | -2.4382696 |
| 16 C C12 | 12.7567662                        | 8.4899856  | -2.4315728 |
| 17 C C13 | 12.9737954                        | 9.9014749  | -2.9346707 |
| 18 C C14 | 14.4336687                        | 10.2741711 | -2.9214815 |
| 19 C C15 | 11.6512316                        | 2.1820074  | 2.0732687  |
| 20 C C16 | 12.0615937                        | 2.1524199  | 3.4977051  |
| 21 C C17 | 11.8216255                        | 1.1265825  | 4.3108388  |
| 22 O O7  | 7.0373165                         | 5.8091276  | -3.7163028 |
| 23 O O8  | 5.0958259                         | 8.6476979  | -1.3361276 |
| 24 O O9  | 6.1258711                         | 3.6731682  | 0.3173147  |
| 25 C C20 | 6.3489147                         | 6.6710827  | -2.9223119 |
| 26 C C21 | 6.2801019                         | 6.5949503  | -1.5713512 |
| 27 C C22 | 5.4281083                         | 7.5568337  | -0.8601497 |
| 28 C C23 | 4.9412503                         | 7.1429508  | 0.4947468  |
| 29 C C24 | 5.3125851                         | 5.8046857  | 1.0496785  |
| 30 C C25 | 6.1689571                         | 4.8978216  | 0.2066357  |
| 31 C C26 | 7.0859918                         | 5.6086901  | -0.7865892 |
| 32 C C27 | 7.8300683                         | 4.5940395  | -1.6918667 |
| 33 C C28 | 7.3483143                         | 4.5268378  | -3.1380847 |
| 34 C C29 | 6.1395966                         | 3.6039429  | -3.2805108 |
| 35 C C30 | 5.8150585                         | 3.3427447  | -4.7354120 |
| 36 C C31 | 4.5694335                         | 2.4938760  | -4.8709982 |
| 37 C C32 | 4.2553819                         | 2.2096259  | -6.3245752 |
| 38 C C33 | 3.0099183                         | 1.3735008  | -6.4664461 |
| 39 H H1  | 7.7298000                         | 7.1331299  | 0.7321457  |
| 40 H H2  | 10.3258531                        | 4.1552841  | 3.6812916  |
| 41 H H3  | 9.9158356                         | 4.2193464  | -2.3354341 |
| 42 H H4  | 9.0978903                         | 6.6369263  | -2.8790781 |

|          |            |            |            |
|----------|------------|------------|------------|
| 43 H H5  | 11.5147419 | 6.5969961  | -0.9212736 |
| 44 H H6  | 11.5921933 | 5.9859567  | -2.6273671 |
| 45 H H7  | 10.7152245 | 8.8339908  | -1.7820085 |
| 46 H H8  | 10.8775991 | 8.2301347  | -3.4772520 |
| 47 H H9  | 13.1632125 | 8.3963190  | -1.3898640 |
| 48 H H10 | 13.3275459 | 7.7697365  | -3.0753918 |
| 49 H H11 | 12.5707374 | 9.9925349  | -3.9780319 |
| 50 H H12 | 12.3953877 | 10.6187364 | -2.2940469 |
| 51 H H13 | 14.5713375 | 11.3165881 | -3.2978423 |
| 52 H H14 | 15.0233712 | 9.5834902  | -3.5717987 |
| 53 H H15 | 14.8462040 | 10.2159725 | -1.8850585 |
| 54 H H16 | 10.8837934 | 1.3905319  | 1.8549936  |
| 55 H H17 | 12.5499871 | 1.9634831  | 1.4289269  |
| 56 H H18 | 12.6175011 | 3.0435987  | 3.8377874  |
| 57 H H22 | 5.8712097  | 7.4664859  | -3.5262899 |
| 58 H H24 | 7.6694262  | 3.5596940  | -1.2618336 |
| 59 H H25 | 8.1851014  | 4.1650234  | -3.8056593 |
| 60 H H26 | 6.3593026  | 2.6336678  | -2.7625585 |
| 61 H H27 | 5.2574268  | 4.0698032  | -2.7680491 |
| 62 H H28 | 6.6801443  | 2.8245142  | -5.2272703 |
| 63 H H29 | 5.6695103  | 4.3207535  | -5.2663343 |
| 64 H H30 | 4.7106453  | 1.5262819  | -4.3208848 |
| 65 H H31 | 3.7006835  | 3.0207999  | -4.3951311 |
| 66 H H32 | 5.1227931  | 1.6772768  | -6.7972041 |
| 67 H H33 | 4.1238123  | 3.1787980  | -6.8746520 |
| 68 H H34 | 2.7982409  | 1.1728973  | -7.5443181 |
| 69 H H35 | 2.1290240  | 1.9000908  | -6.0260326 |
| 70 H H36 | 3.1299299  | 0.3946476  | -5.9423978 |
| 71 H H43 | 11.2724196 | 0.2293669  | 3.9951806  |
| 72 H H47 | 12.1657502 | 1.1168863  | 5.3535214  |
| 73 H H37 | 4.6664937  | 7.9850124  | 1.1627758  |
| 74 O O5  | 4.0050345  | 6.0527860  | 0.4995496  |
| 75 C C18 | 5.3773663  | 5.5943702  | 2.5386898  |
| 76 H H19 | 4.8908978  | 6.4707968  | 3.0477175  |
| 77 H H20 | 6.4618991  | 5.5880046  | 2.8442381  |
| 78 C C19 | 4.7397030  | 4.3266343  | 2.9736407  |
| 79 H H38 | 4.8732896  | 3.4733431  | 2.2856124  |
| 80 C C34 | 4.0634241  | 4.2045406  | 4.1131290  |
| 81 H H23 | 3.6169576  | 3.2513478  | 4.4250179  |
| 82 H H39 | 3.9074525  | 5.0395254  | 4.8087756  |

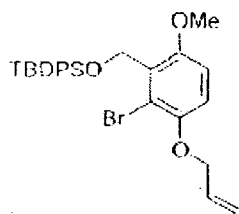

**12**

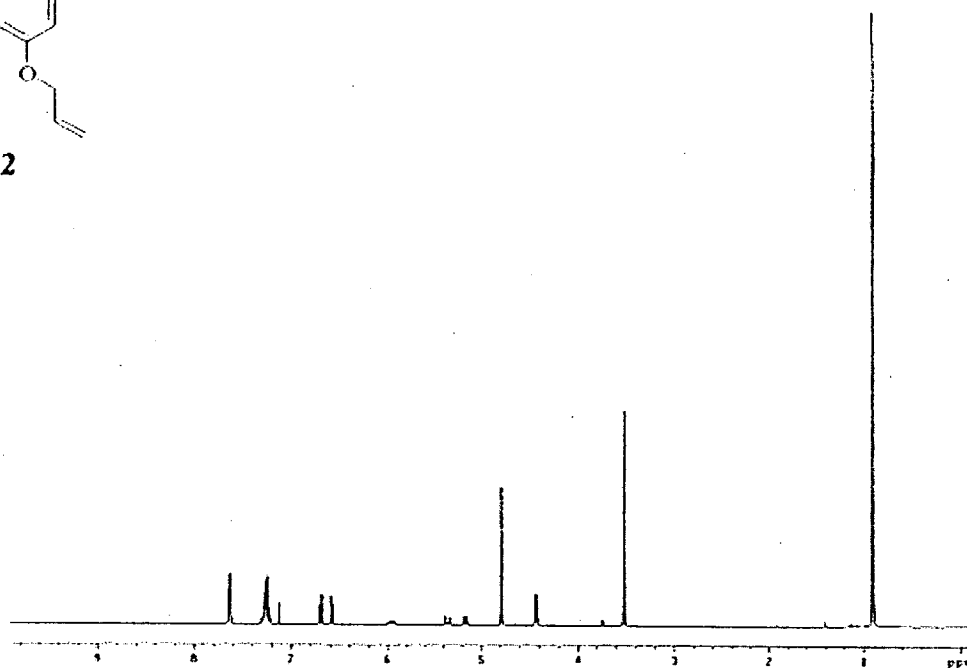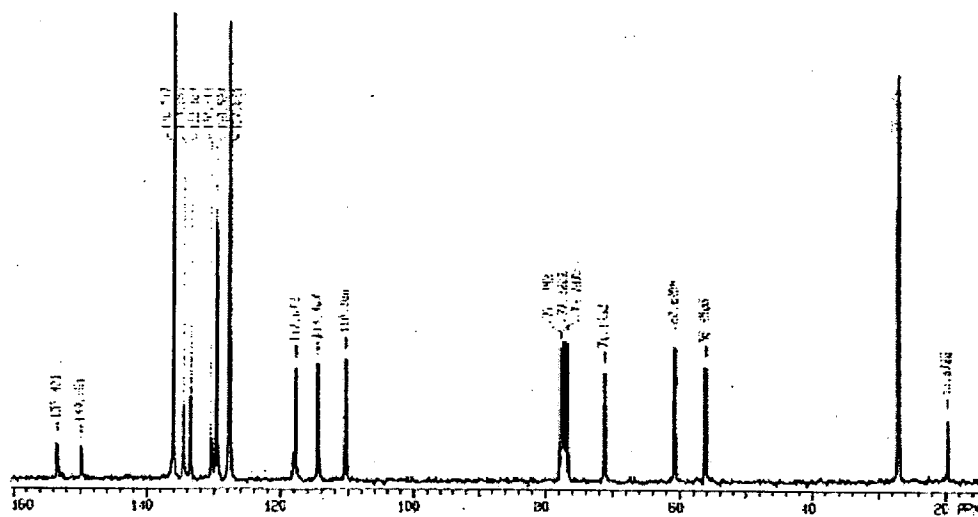

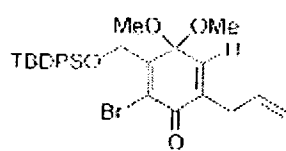

28

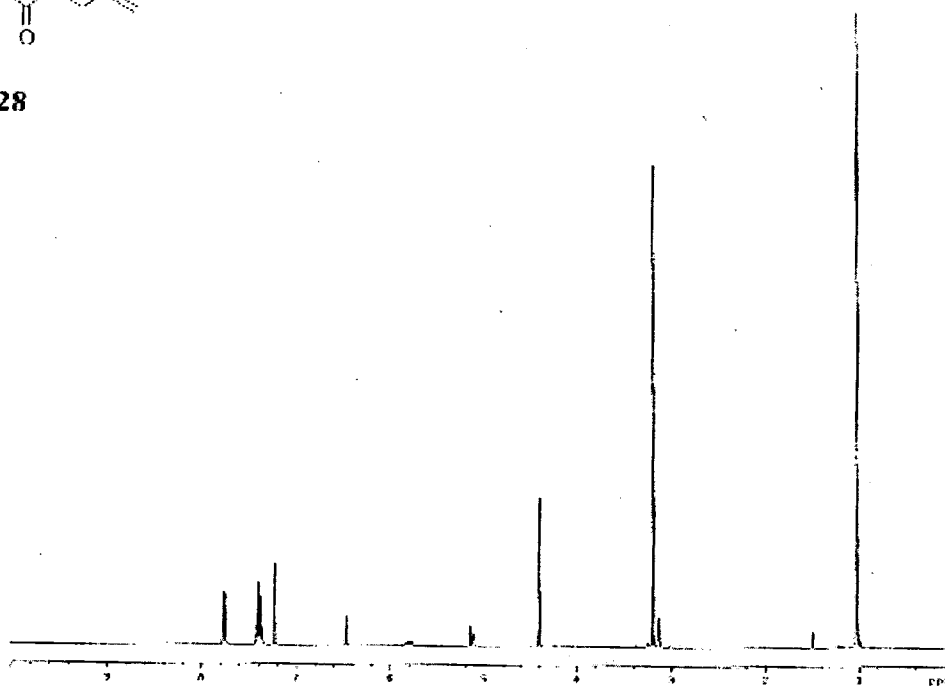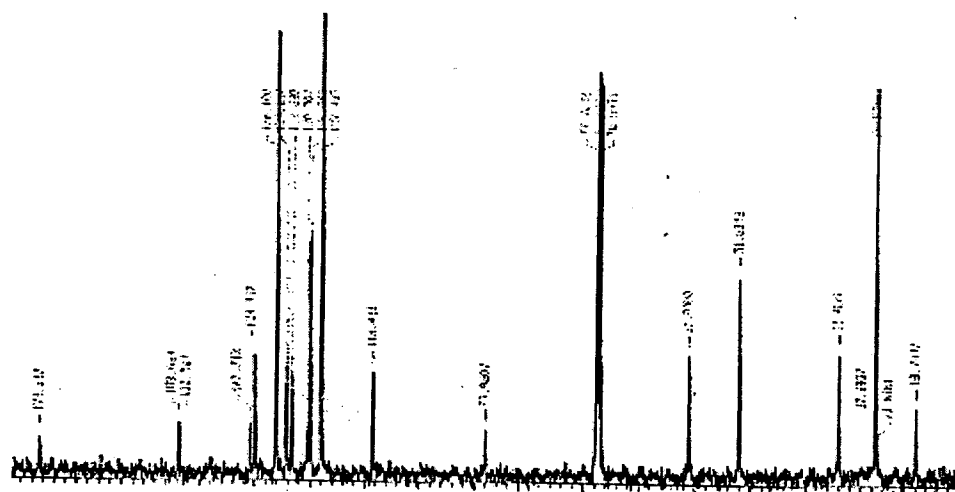

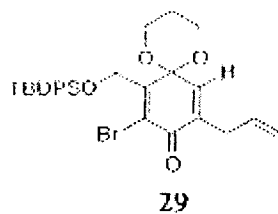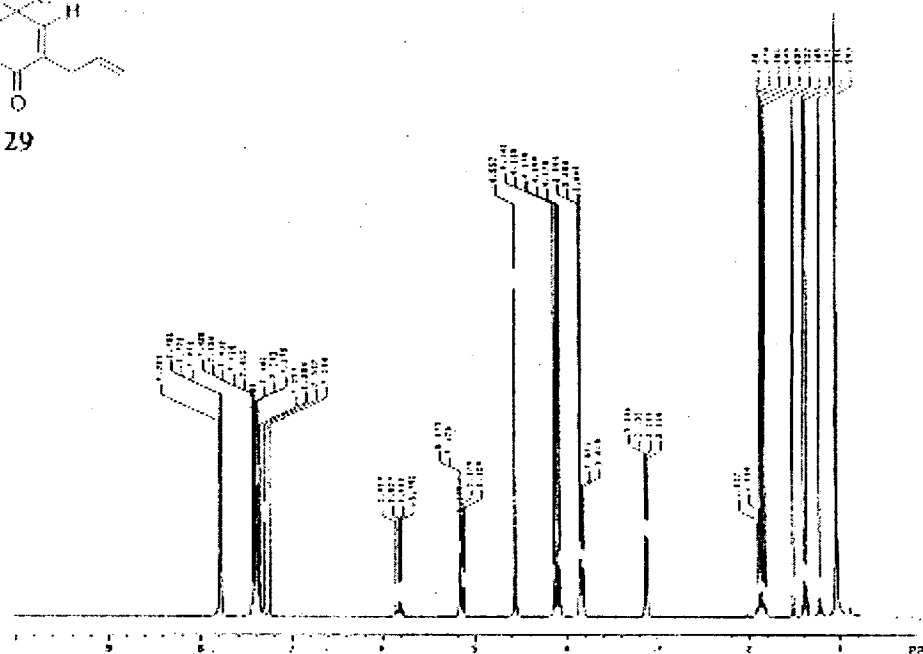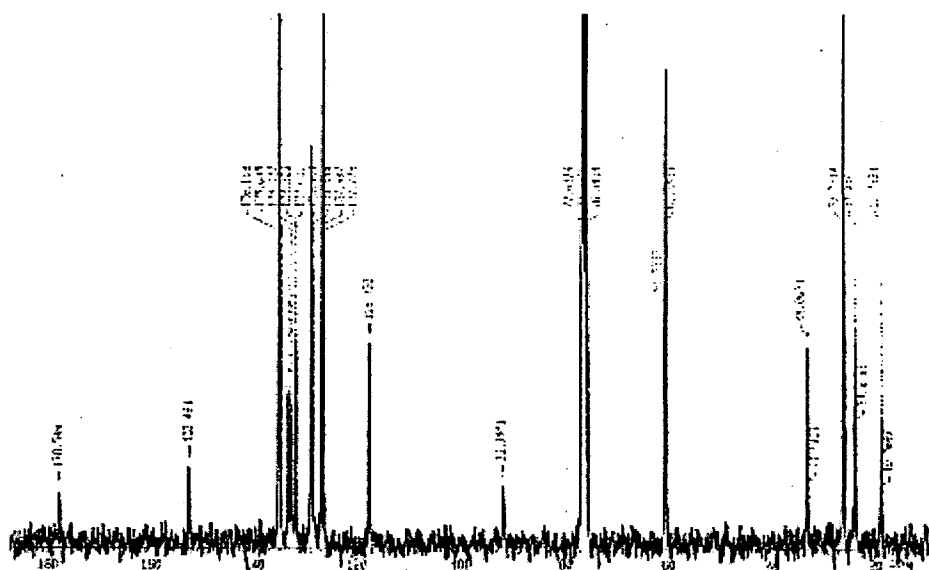

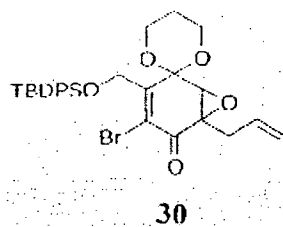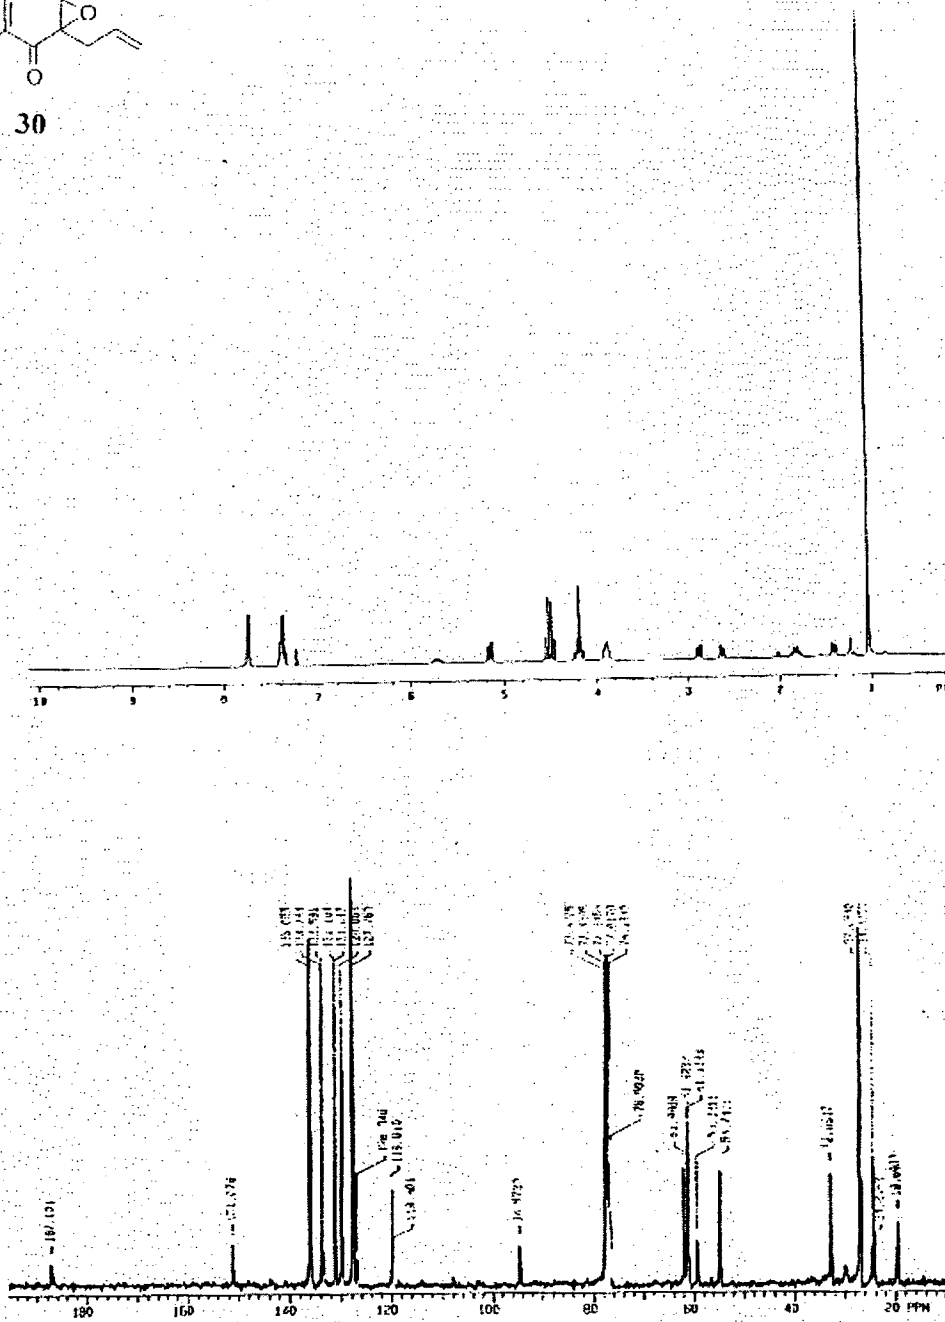



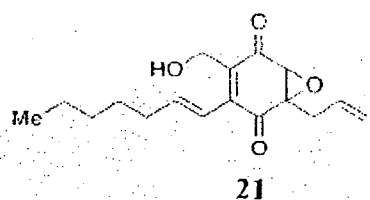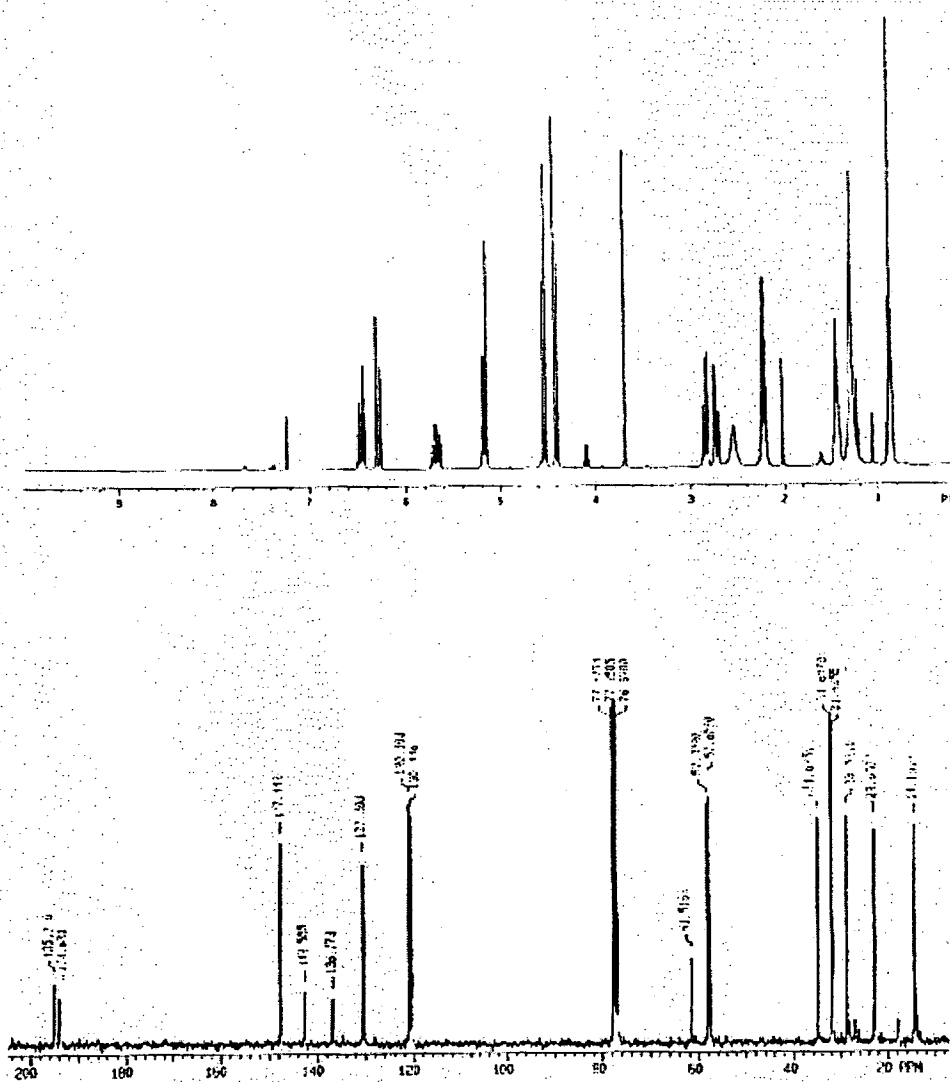

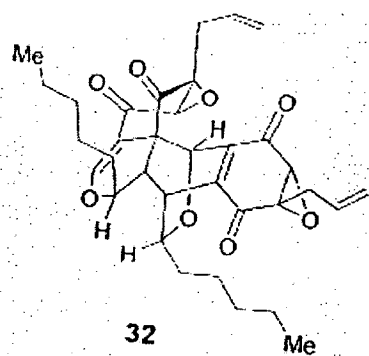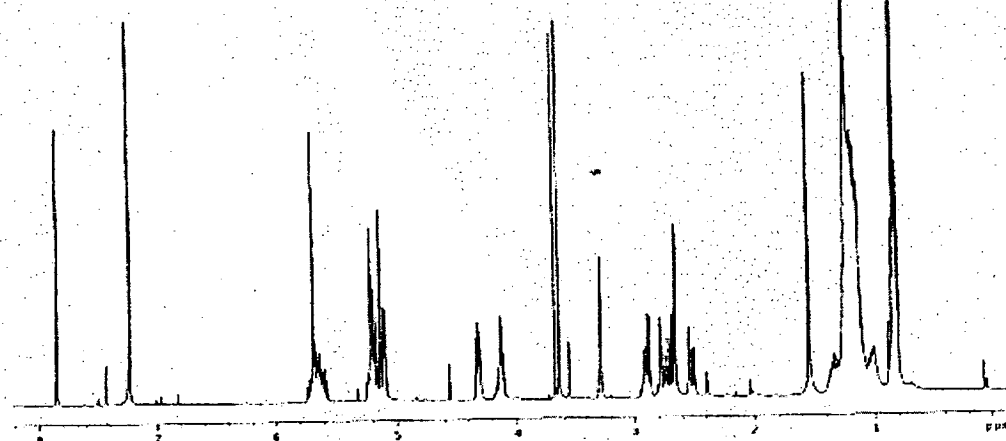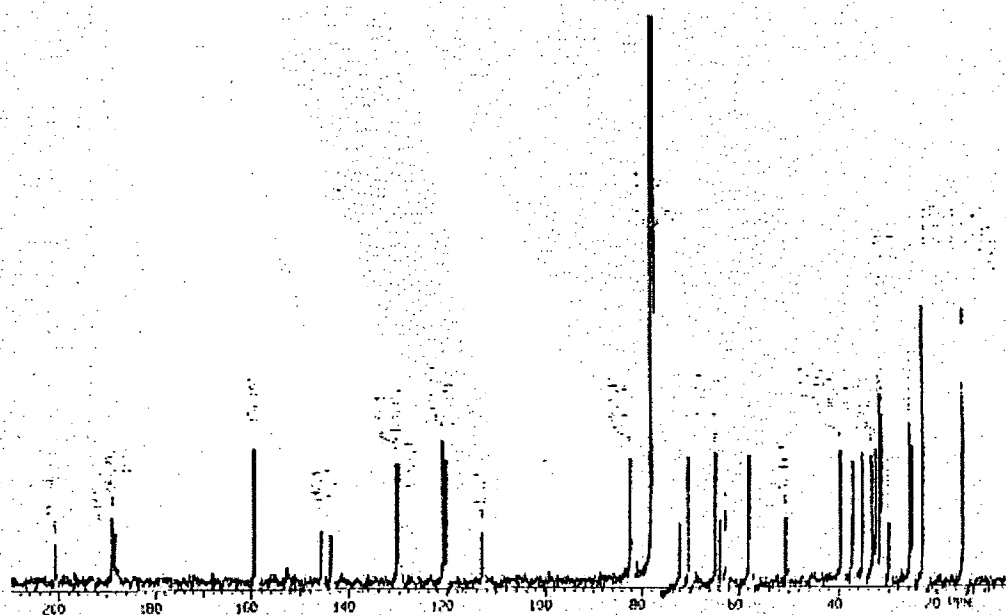

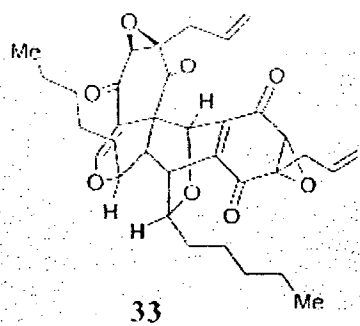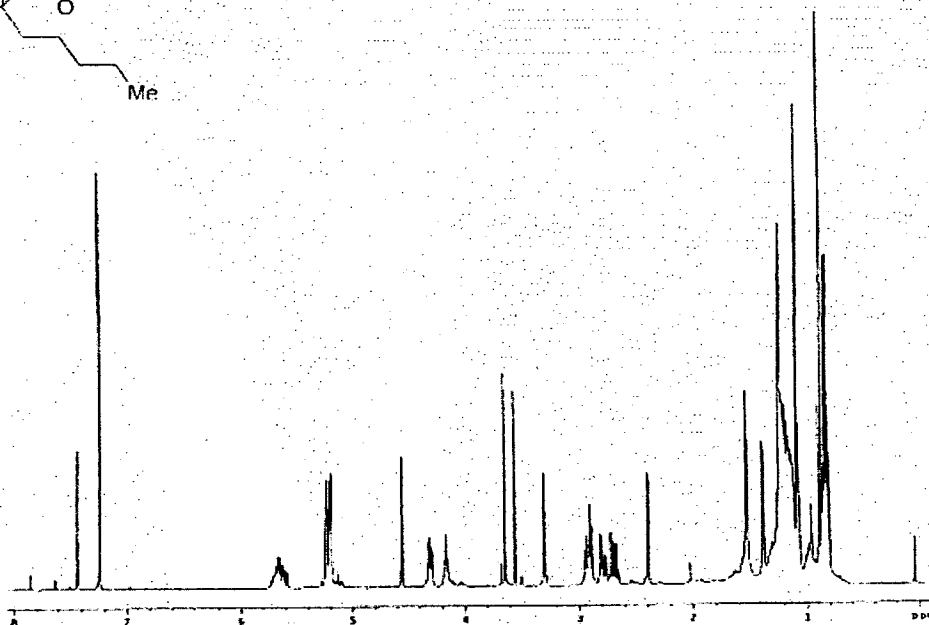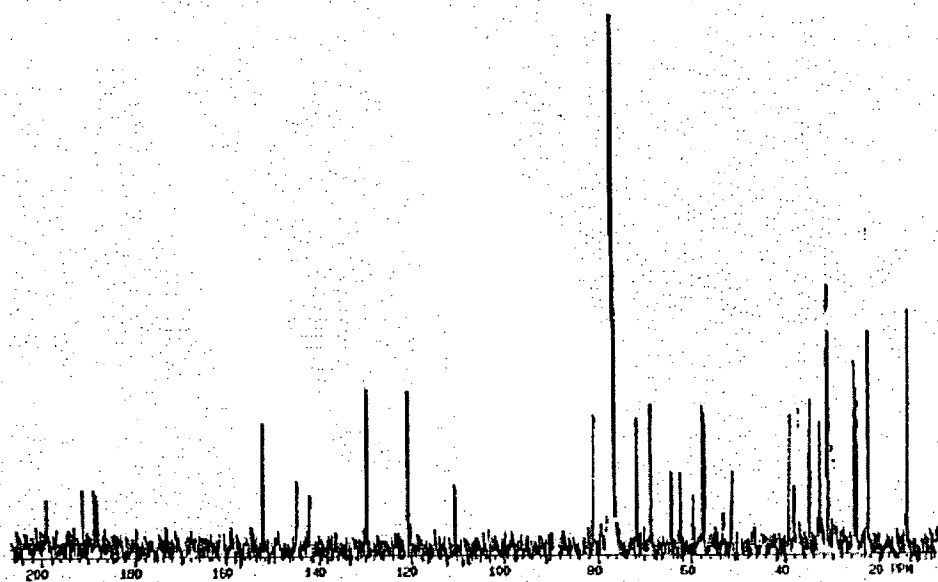

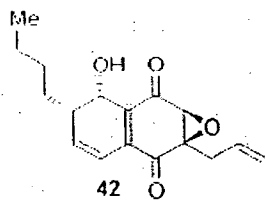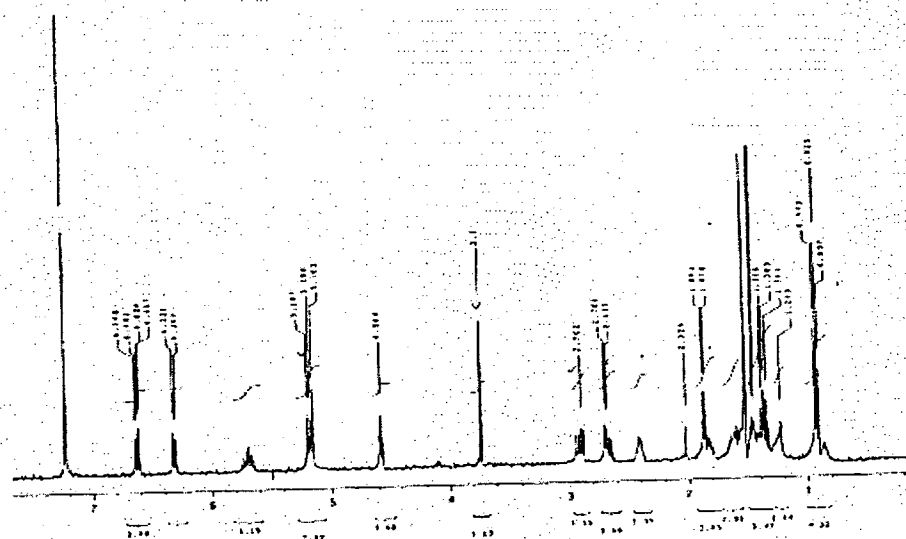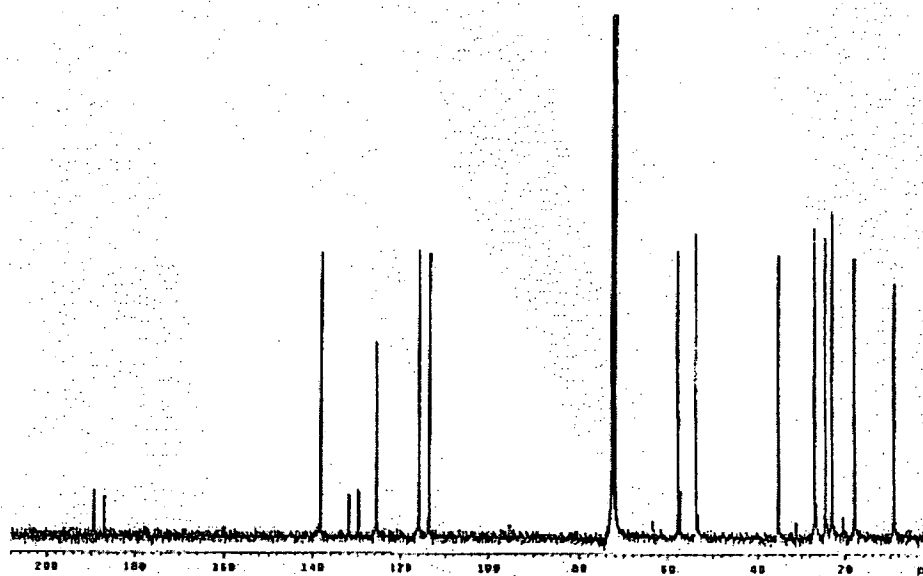

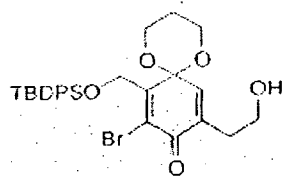

48

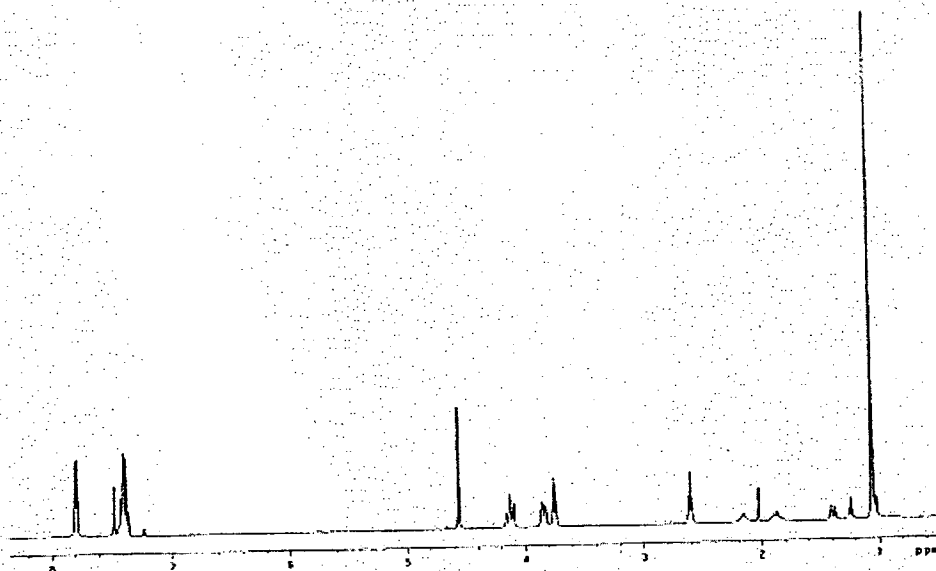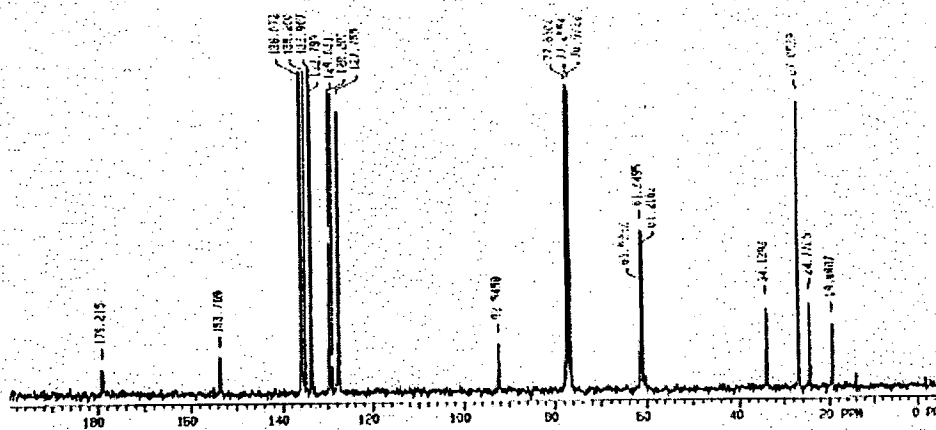

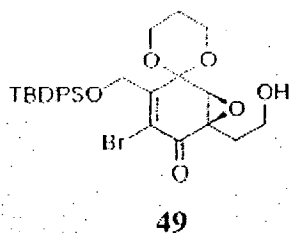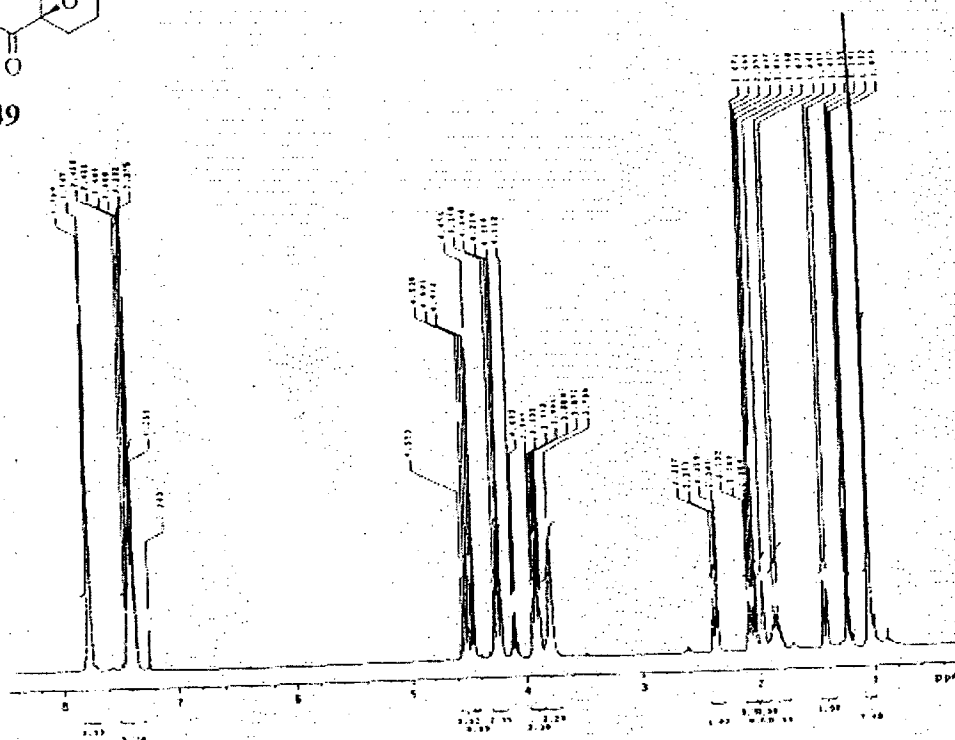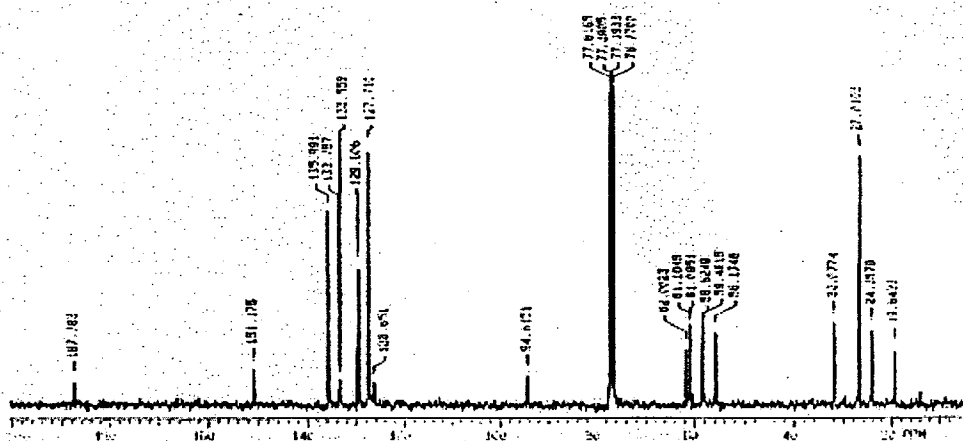

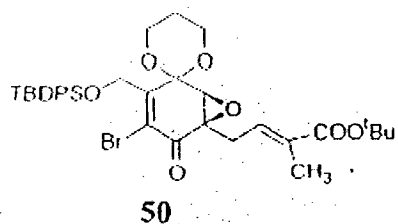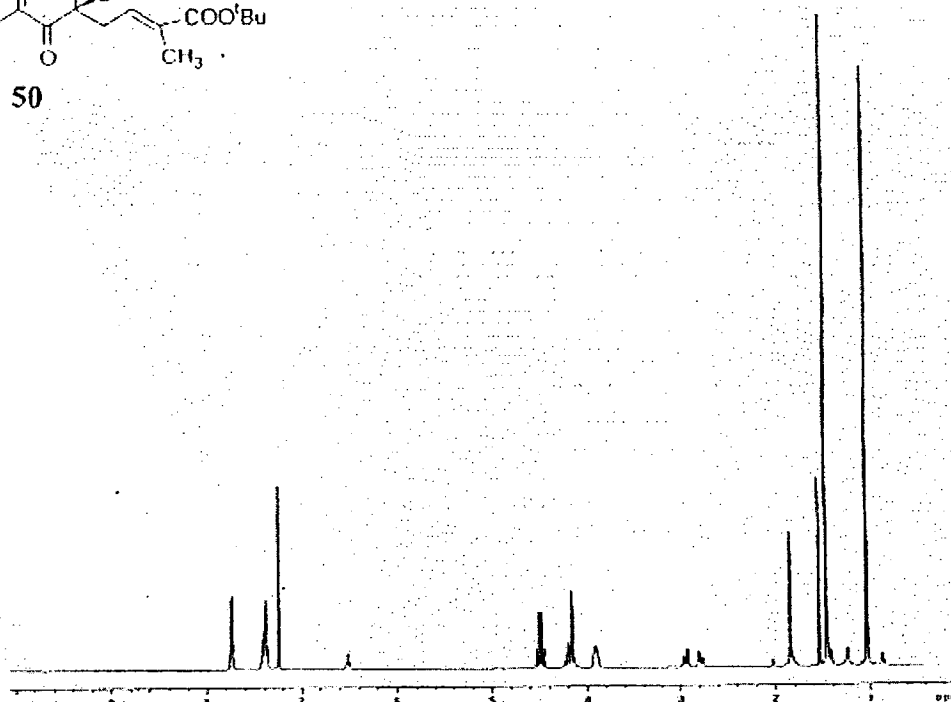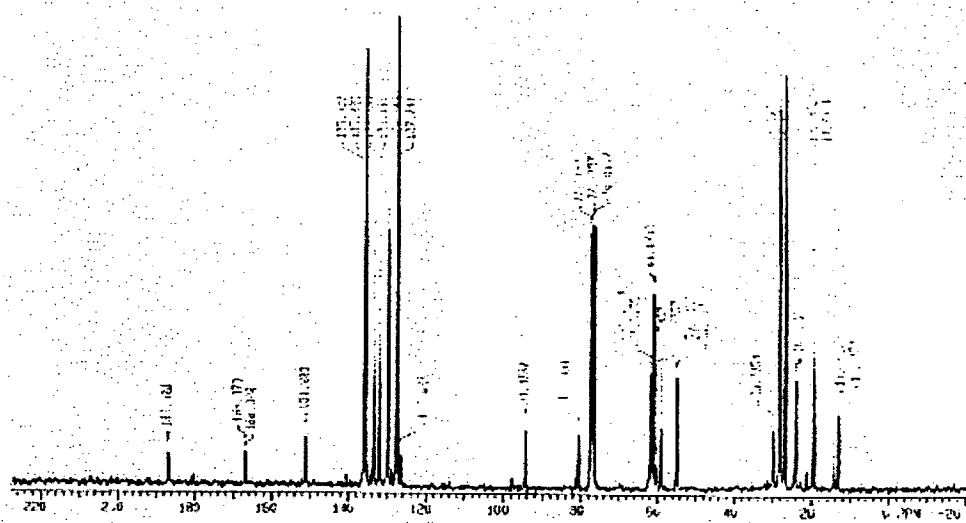

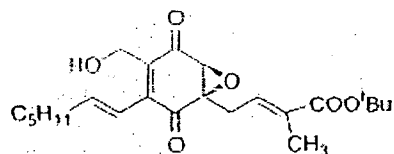

9

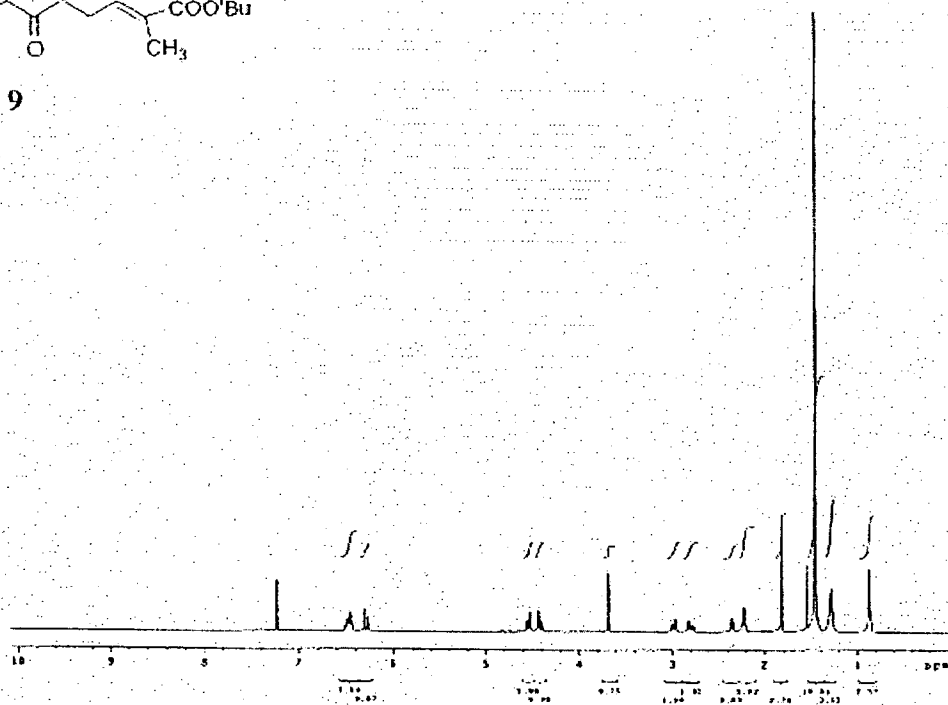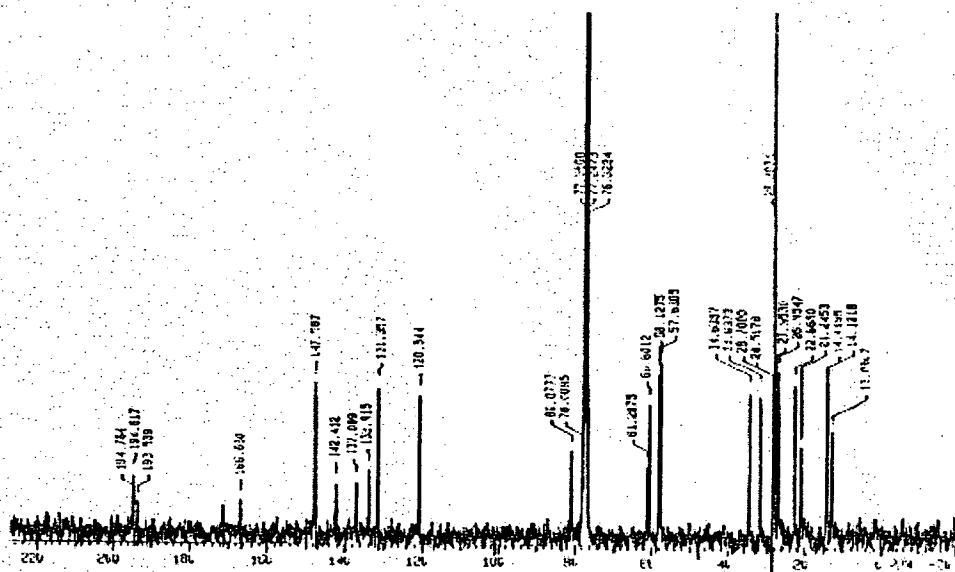



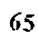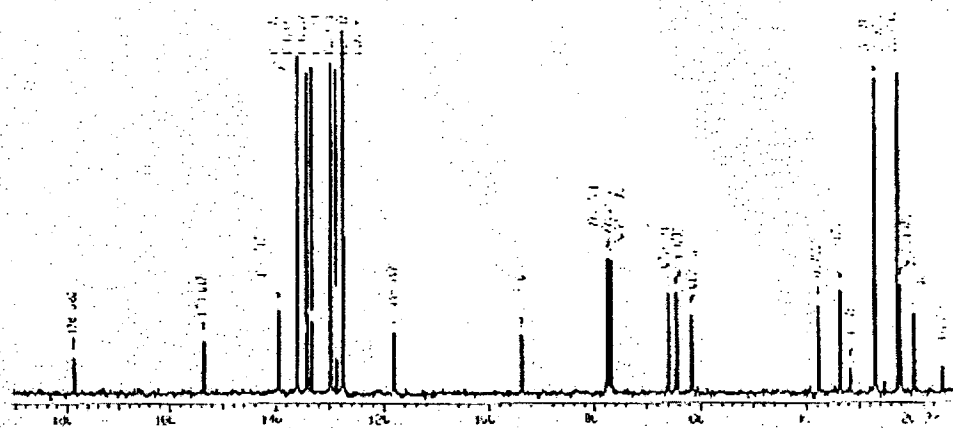

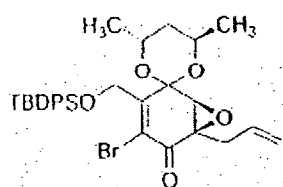

51

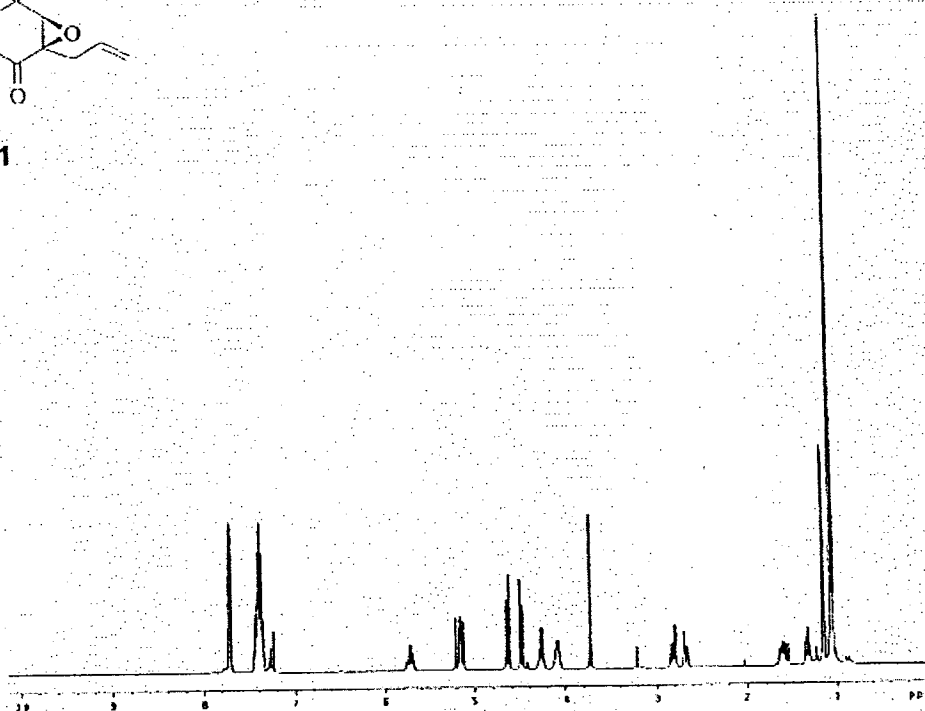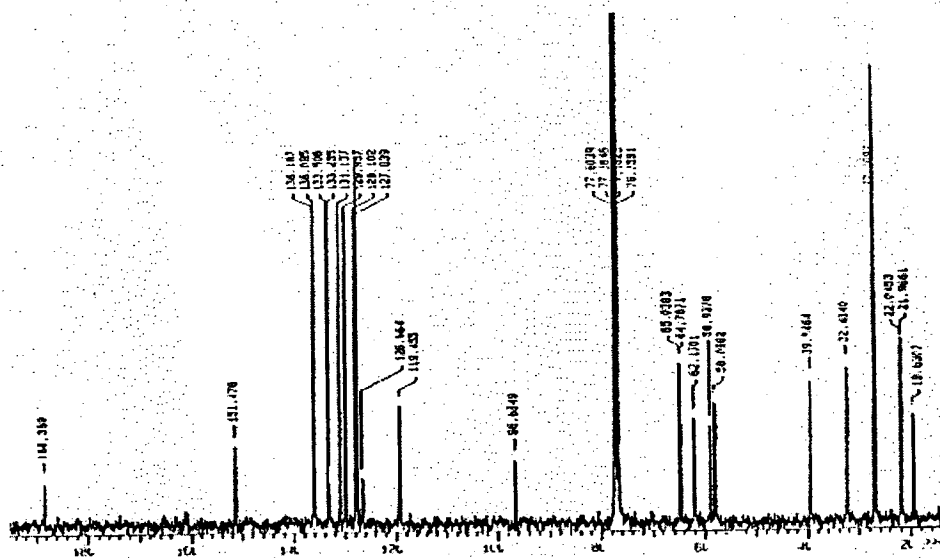

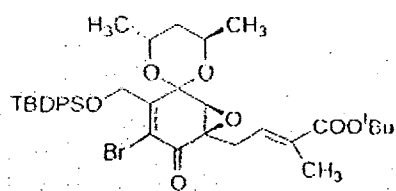

52

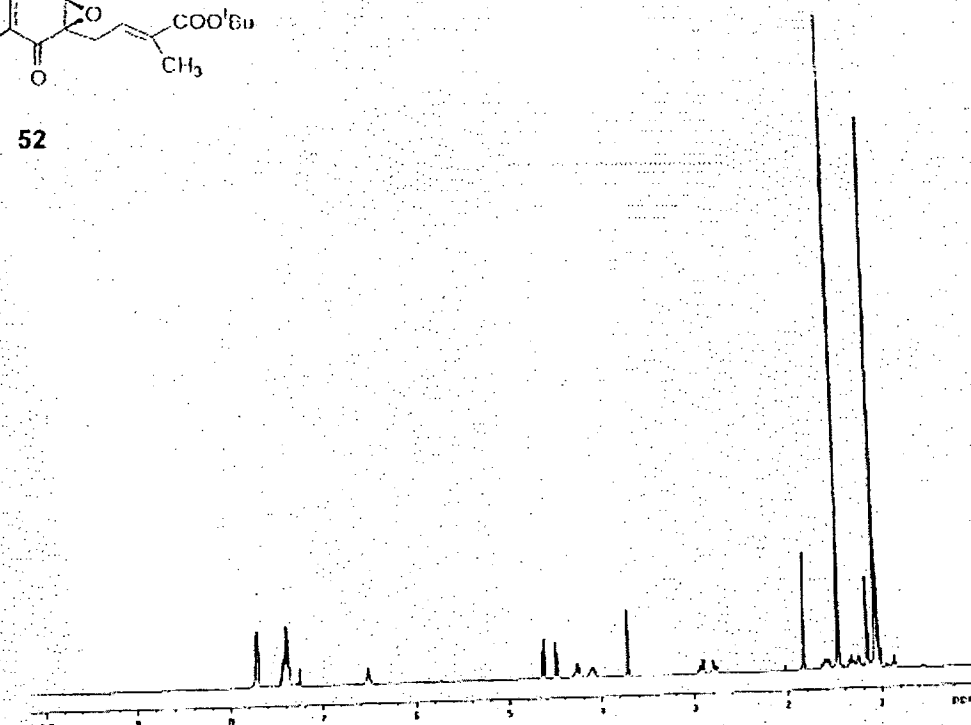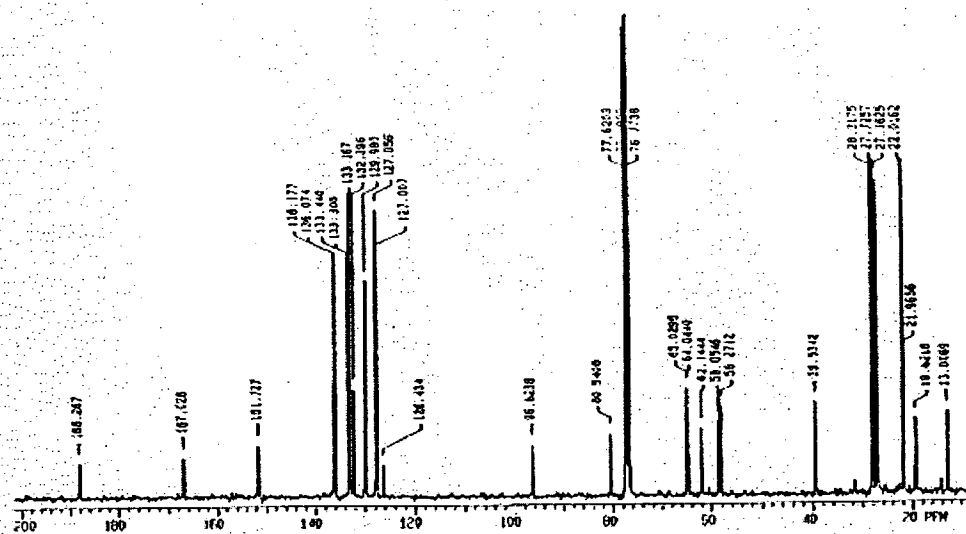

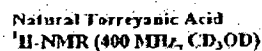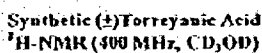

Natural Torreyanic Acid  
 $^{13}\text{C}$  NMR (100 MHz,  $\text{CD}_3\text{OD}$ )

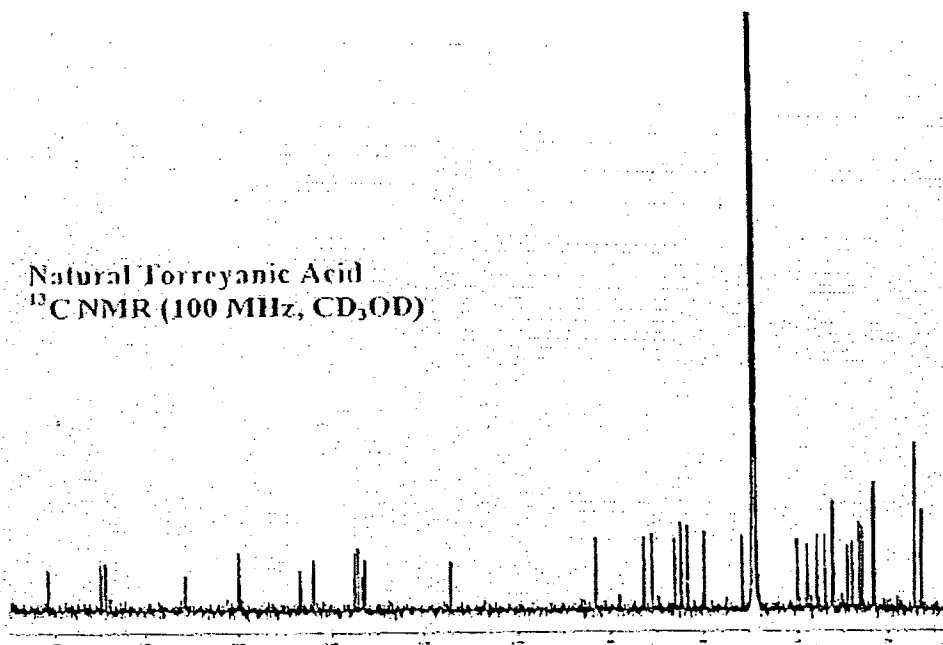

Synthetic ( $\pm$ ) Torreyanic Acid  
 $^{13}\text{C}$  NMR (75.0 MHz,  $\text{CD}_3\text{OD}$ )

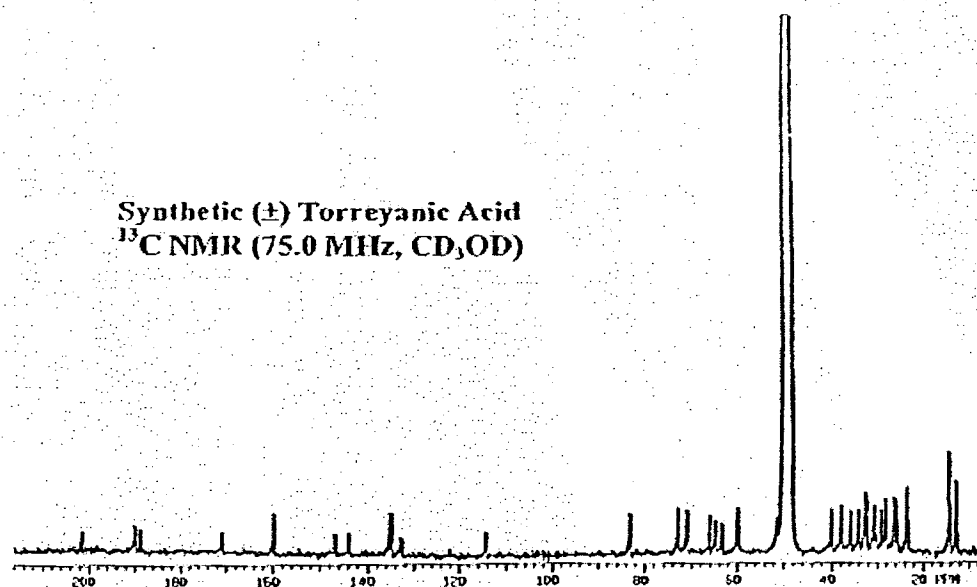

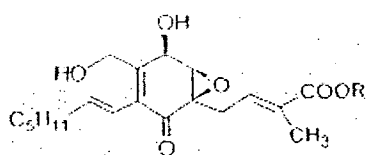

55

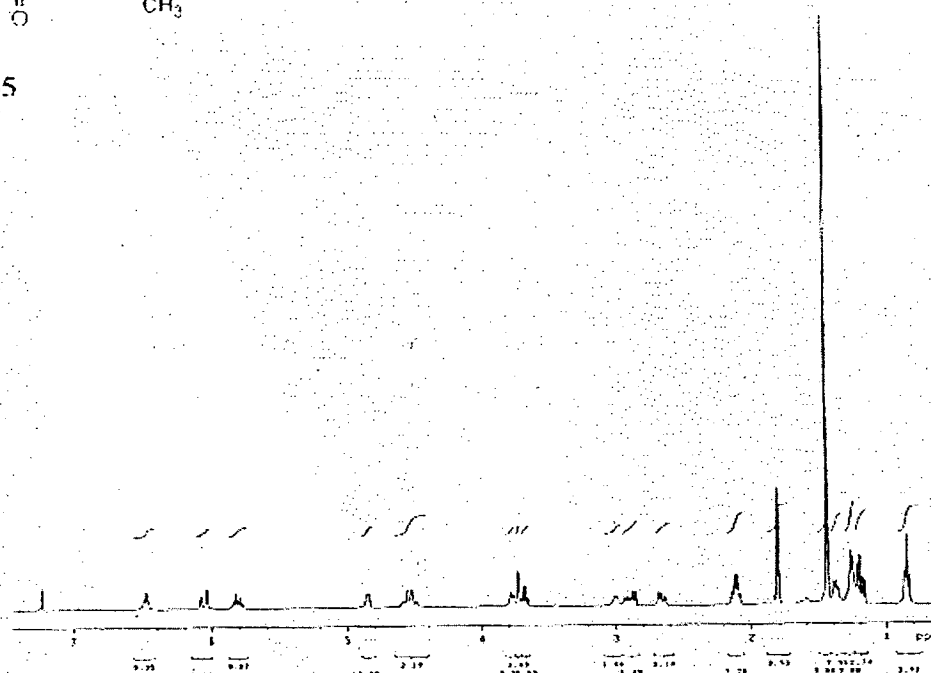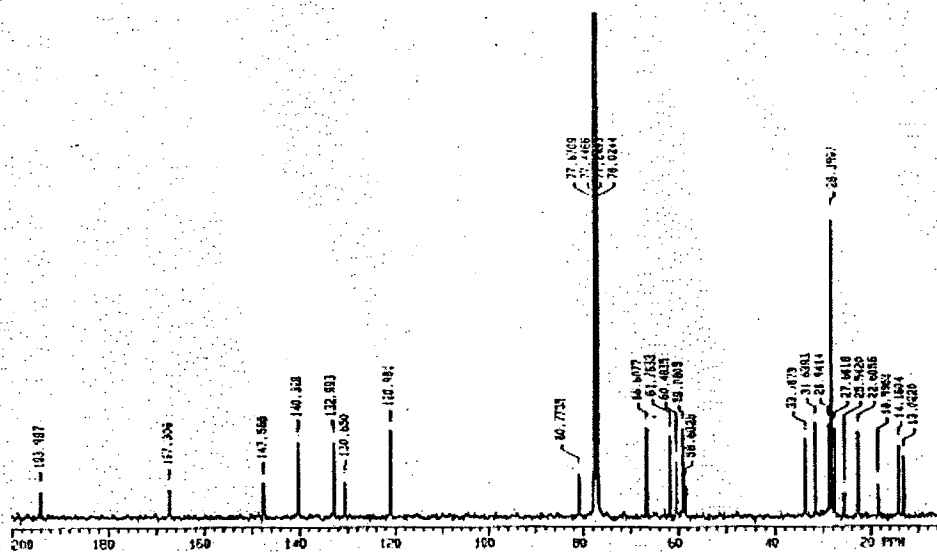

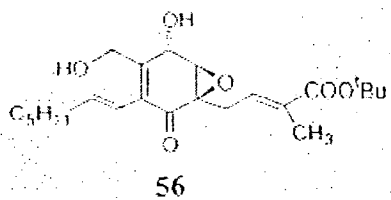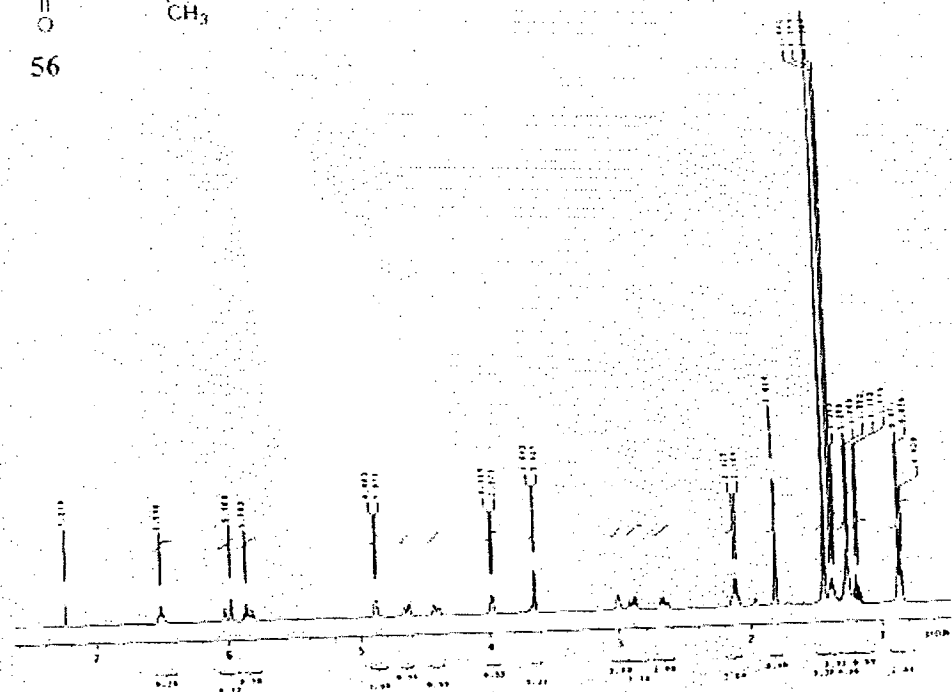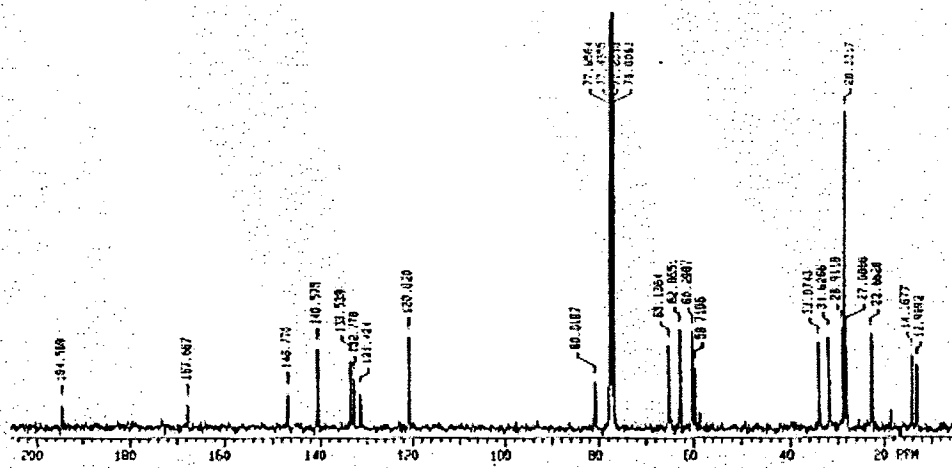

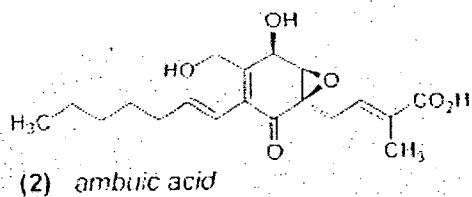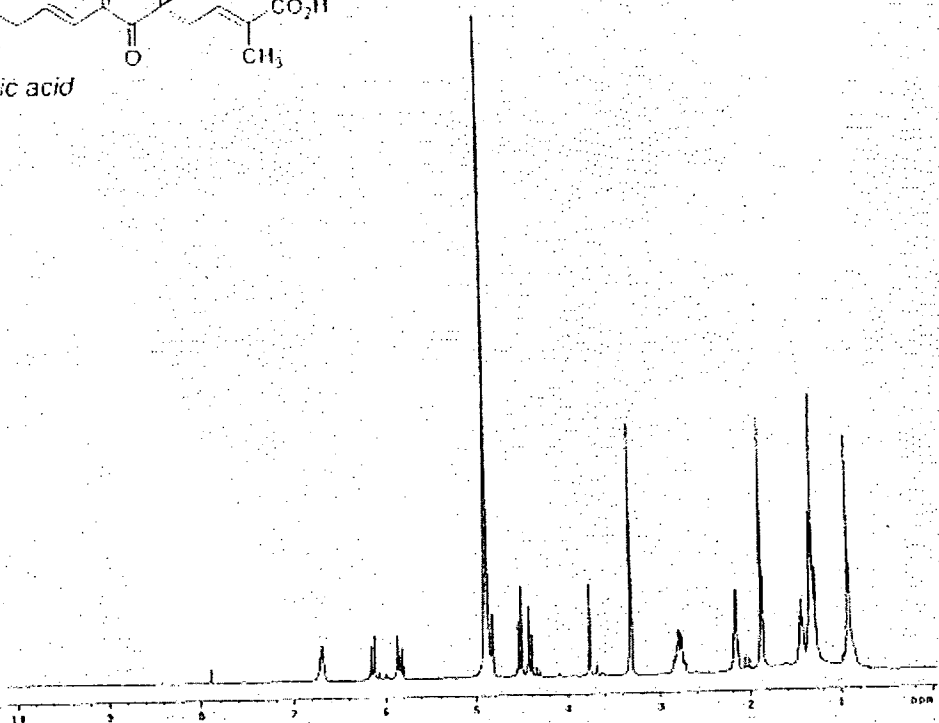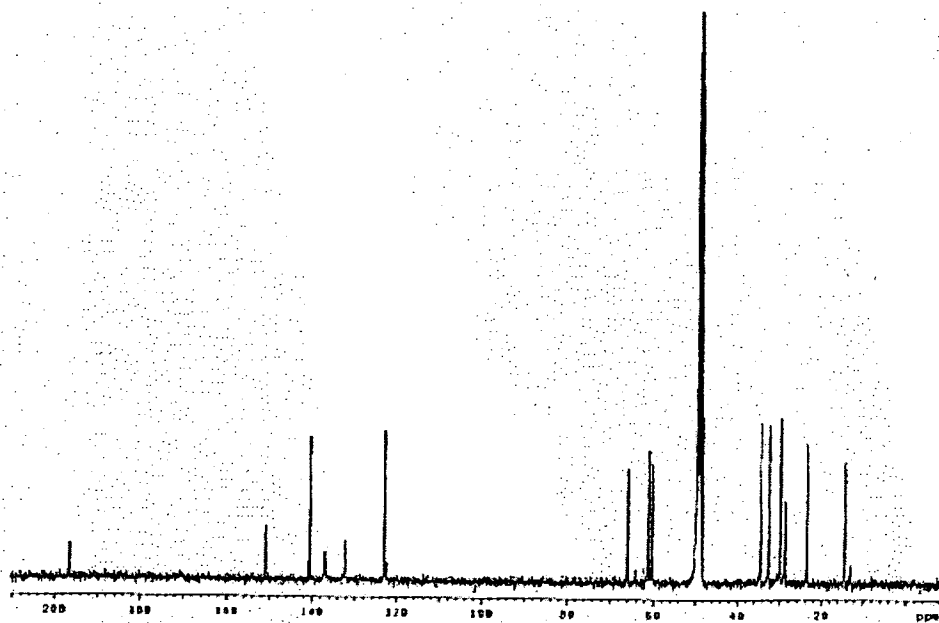

Supplement: Supplementary file 1 [file 5731047]
